# Supplementary material for: Deciphering the late steps of rifamycin biosynthesis
Source: PubMed Central journal article supplement (PMC6002545; doi:10.1038/s41467-018-04772-x), 2018-06-14
Supplement: 41467_2018_4772_MOESM1_ESM.pdf [file 41467_2018_4772_MOESM1_ESM.pdf]

# **Supplementary Information**

## **Deciphering the late steps of rifamycin biosynthesis**

*Qi et al.*

## TABLE OF CONTENTS

|                                                                                                                                                                    |    |
|--------------------------------------------------------------------------------------------------------------------------------------------------------------------|----|
| <b>Supplementary Figures</b> .....                                                                                                                                 | 4  |
| <b>Supplementary Figure 1</b> The putative rifamycin biosynthetic pathway.....                                                                                     | 4  |
| <b>Supplementary Figure 2</b> Plasmid maps.....                                                                                                                    | 5  |
| <b>Supplementary Figure 3</b> SDS-PAGE analysis of purified Rif16, Rif16 <sub>R84W</sub> , Rif15, Rif15a,<br>and Rif15b.....                                       | 6  |
| <b>Supplementary Figure 4</b> The UV-visible absorption spectra of purified Rif16.....                                                                             | 7  |
| <b>Supplementary Figure 5</b> The inter-conversion of R-S and R-SV .....                                                                                           | 8  |
| <b>Supplementary Figure 6</b> The spontaneous oxidation of R-SV to R-S in the presence of<br>different divalent metal ions.....                                    | 9  |
| <b>Supplementary Figure 7</b> Protein sequence alignment of Rif15 and six other transketolases<br>.....                                                            | 11 |
| <b>Supplementary Figure 8</b> The high resolution mass spectrum of R-L.....                                                                                        | 12 |
| <b>Supplementary Figure 9</b> <sup>1</sup> H NMR spectra of R-S, R-B, and R-L .....                                                                                | 13 |
| <b>Supplementary Figure 10</b> <sup>13</sup> C NMR and DEPT135 spectra of R-L.....                                                                                 | 14 |
| <b>Supplementary Figure 11</b> HSQC spectrum of R-L .....                                                                                                          | 15 |
| <b>Supplementary Figure 12</b> <sup>1</sup> H- <sup>1</sup> H COSY spectrum of R-L .....                                                                           | 16 |
| <b>Supplementary Figure 13</b> HMBC spectrum of R-L .....                                                                                                          | 17 |
| <b>Supplementary Figure 14</b> The activity of the transketolase Rif15 with different C <sub>2</sub> donors<br>.....                                               | 18 |
| <b>Supplementary Figure 15</b> The high resolution mass spectrum of biosynthesized R-B.....                                                                        | 19 |
| <b>Supplementary Figure 16</b> Multiple protein sequence alignment between Rif16 and other<br>P450 enzymes with their substrates different in size and shape ..... | 20 |
| <b>Supplementary Figure 17</b> Structures of Rif16.....                                                                                                            | 21 |
| <b>Supplementary Figure 18</b> HPLC-HRMS analysis of the transient intermediate (R-O)<br>between R-L and R-B.....                                                  | 22 |
| <b>Supplementary Figure 19</b> The high resolution mass spectra of the <sup>13</sup> C labeled R-L and R-B<br>.....                                                | 23 |
| <b>Supplementary Figure 20</b> The substrate binding curve R-L toward Rif16 .....                                                                                  | 24 |
| <b>Supplementary Figure 21</b> UV-visible absorption spectra of purified Rif16 <sub>R84W</sub> .....                                                               | 25 |
| <b>Supplementary Figure 22</b> HPLC analysis of the reactions catalyzed by Rif16 <sub>R84W</sub> .....                                                             | 26 |

|                                                                                                                                          |    |
|------------------------------------------------------------------------------------------------------------------------------------------|----|
| <b>Supplementary Figure 23</b> HPLC analysis of R-L degradation.....                                                                     | 27 |
| <b>Supplementary Figure 24</b> Protein sequence alignment of Rif16 and nine other P450s .....                                            | 28 |
| <b>Supplementary Tables</b> .....                                                                                                        | 30 |
| <b>Supplementary Table 1</b> The nucleotide sequences of <i>rif15</i> and <i>rif16</i> .....                                             | 30 |
| <b>Supplementary Table 2</b> <sup>1</sup> H (600 MHz) and <sup>13</sup> C (150 MHz) NMR data for R-L and R-B in CD <sub>3</sub> OD ..... | 31 |
| <b>Supplementary Table 3</b> Amino acid sequence similarity and identity of Rif15a, Rif15b and Rif16 with other similar proteins .....   | 32 |
| <b>Supplementary Table 4</b> Oligonucleotide primers used in this study .....                                                            | 33 |
| <b>Supplementary Table 5</b> Data collection and refinement statistics for Rif16 structures .....                                        | 34 |
| <b>Supplementary References</b> .....                                                                                                    | 35 |

## Supplementary Figures

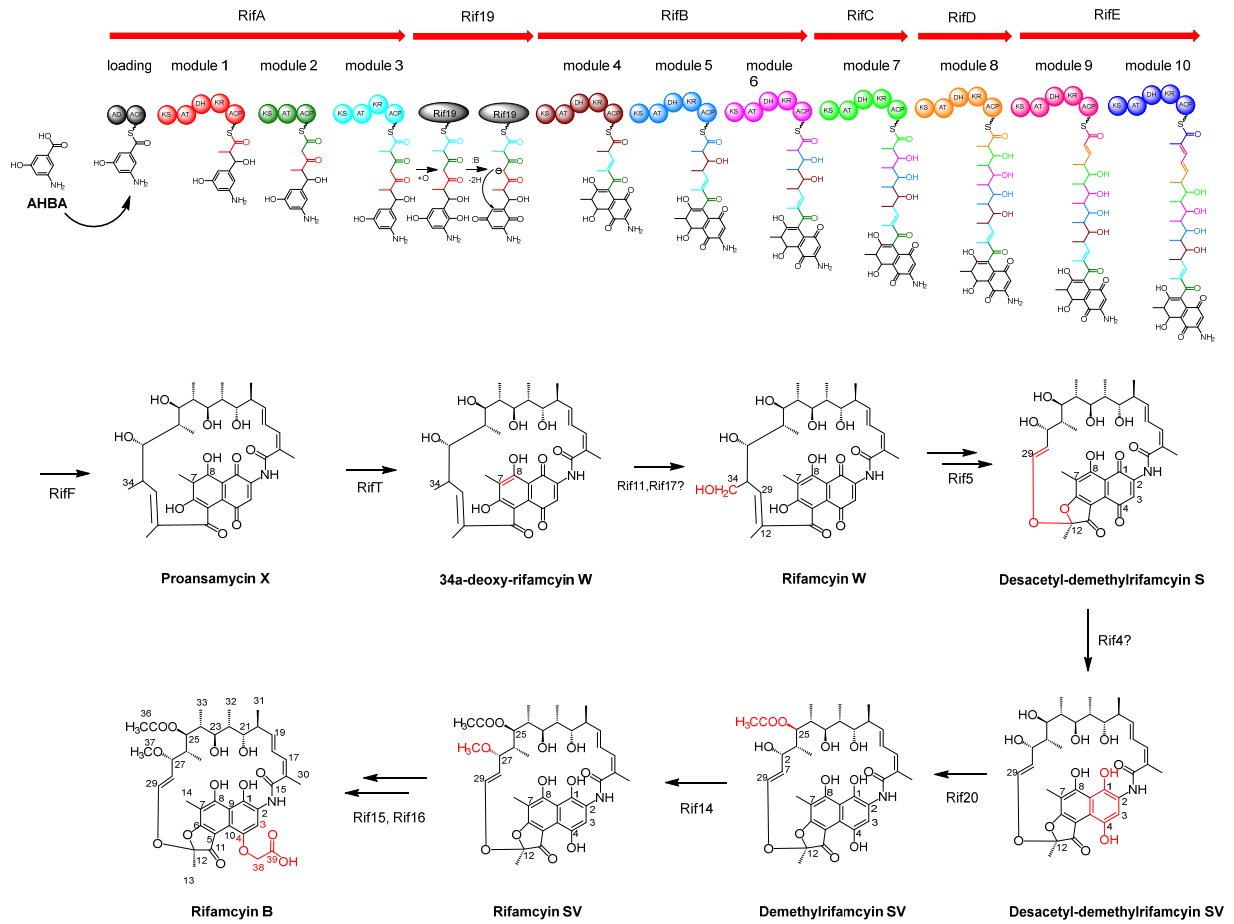

Supplementary Figure 1 The putative rifamycin biosynthetic pathway.

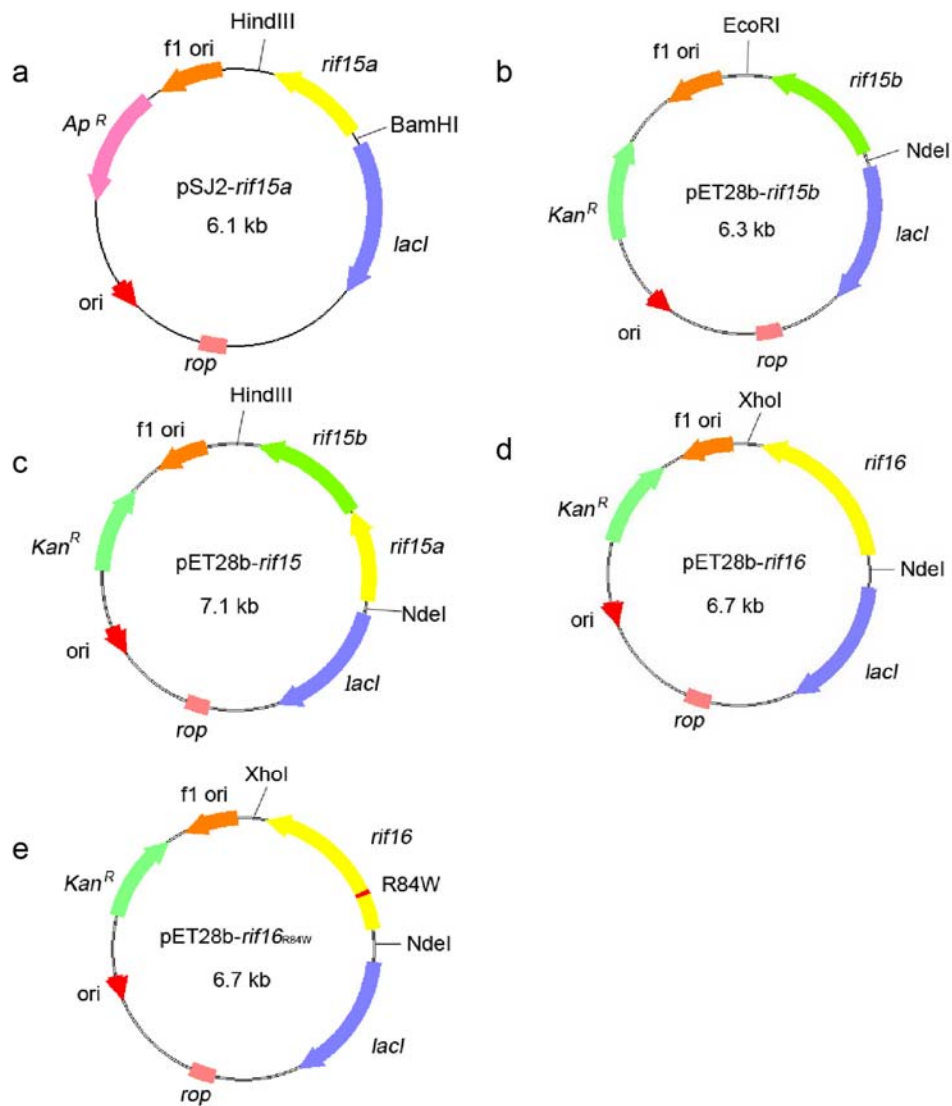

**Supplementary Figure 2** Plasmid maps. **a** pSJ2-*rif15a*, **b** pET28b-*rif15b*, **c** pET28b-*rif15*, **d** pET28b-*rif16*, and **e** pET28b-*rif16*<sub>R84W</sub>.

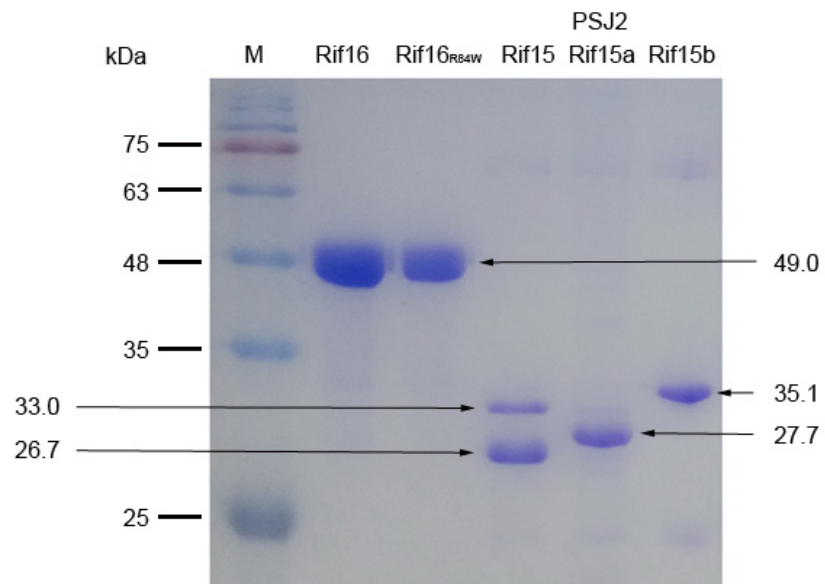

**Supplementary Figure 3** SDS-PAGE analysis of purified Rif16, Rif16<sub>R84W</sub>, Rif15, Rif15a, and Rif15b. The calculated molecular masses in kDa are shown by arrows.

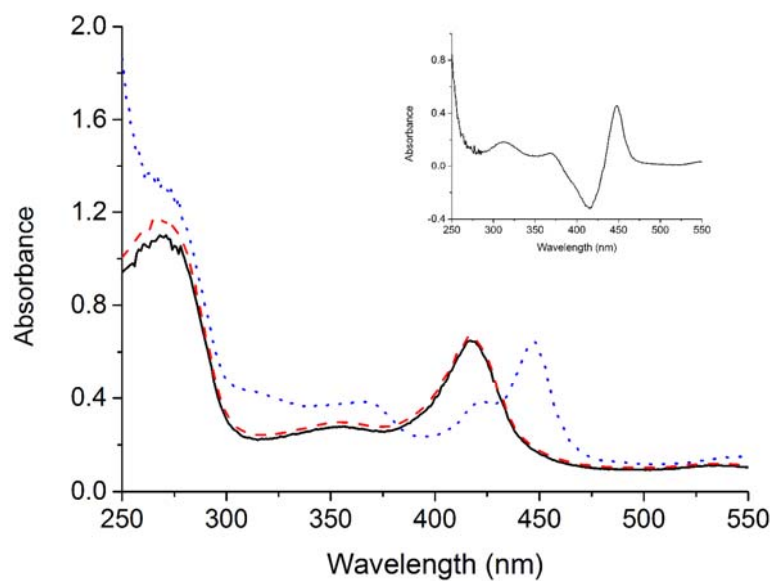

**Supplementary Figure 4** The UV-visible absorption spectra of purified Rif16. Ferric form (black solid line), CO-saturated form (red dash line), sodium dithionite reduced and CO-bound form (blue dot line). The CO-bound reduced difference spectrum is shown in inset. This spectrum was also used to determine the concentration of functional P450 enzyme using the extinction coefficient of  $91,000 \text{ M}^{-1}\cdot\text{cm}^{-1}$ .

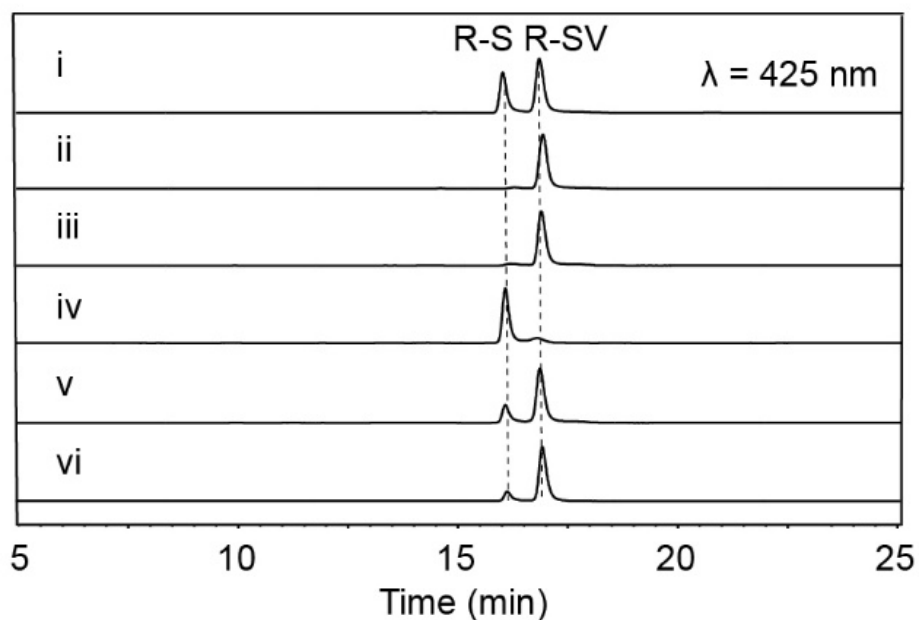

**Supplementary Figure 5** The inter-conversion of R-S and R-SV. (i), R-S and R-SV standards; (ii) 200  $\mu\text{M}$  R-SV with 2  $\mu\text{M}$  Rif16 in the presence of 20  $\mu\text{M}$  *seFdx*, 10  $\mu\text{M}$  *seFdR* and 1 mM NADPH, 28  $^{\circ}\text{C}$  for 1 h; (iii) 200  $\mu\text{M}$  R-S mixed with *seFdx*, *seFdR* and NADPH, 28  $^{\circ}\text{C}$  for 1 h; (iv) 200  $\mu\text{M}$  R-S mixed with *seFdx* and *seFdR*, 28  $^{\circ}\text{C}$  for 1 h; (v) 200  $\mu\text{M}$  R-S mixed with NADPH, 28  $^{\circ}\text{C}$  for 1 h; (vi) 200  $\mu\text{M}$  R-SV incubated in reaction buffer, at 28  $^{\circ}\text{C}$  for 16 h. All the reactions were quenched by adding the same volume of methanol.



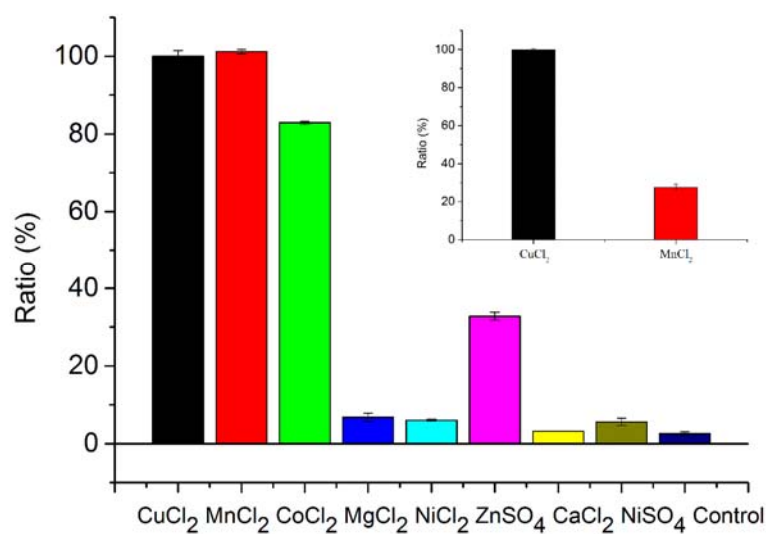

**Supplementary Figure 6** The spontaneous oxidation of R-SV to R-S in the presence of different divalent metal ions. In a standard reaction, R-SV (200  $\mu$ M) was mixed with a certain divalent metal salt (2.5 mM) in 20 mM Tris-HCl buffer (pH 7.4), 28  $^{\circ}$ C for 1 h. The control reaction contained no added metal ions. The oxidation efficiencies are shown in relative conversion ratios. The inset shows the two reactions for 1 min in the presence of 2.5 mM Cu<sup>2+</sup> or Mn<sup>2+</sup>. All the data are means  $\pm$  s.d. ( $n=3$ ).

*S. cerevisiae* α1 100 200 300 400 500 600 700 TT TT TT β1 η1

*S. cerevisiae* .....MTQFTDIDKLAVS **IRIRI**AVD**TVSKANS****GR**GA**PLGM**AP**AAHV**WS**Q**.**HRM**N**PTN**PD**WLN**R**DRF**VL**SN**GH**AV**ALL  
*M.tuberculosis* MTTLEERISALTRPRHPDYWTEIDSAAVD **IRIRI**AA**DAVQ**KV**GN****GR**GA**PLGM**AP**AAHV**WS**Q**.**HRM**N**PTN**PD**WLN**R**DRF**VL**SN**GH**AV**ALL  
*E.coli* .....SSR**KELANA**IR**ALS**MD**AVQK**AK**SG****GR**GA**PLGM**AP**AAHV**WS**Q**.**HRM**N**PTN**PD**WLN**R**DRF**VL**SN**GH**AV**ALL  
*H.sapiens* SYHKP .....D**Q**KL**QAL**KD**TAN**RI**RS**SI**QAT**TA**AG**SG**GR**GA**PLGM**AP**AAHV**WS**Q**.**HRM**N**PTN**PD**WLN**R**DRF**VL**SN**GH**AV**ALL  
*A.rifamycinica* M.....Q**M**TE**E**IR**CF**GR**MT**GD**E**K**HW**AA**ST**IR**HW**Y**EV**LV**SV**PN**IDD**PD**DR**FL**SK**GH**AV**ALL  
*S.arenicola* M.....Q**M**TE**E**IR**CF**GR**MT**GD**E**K**HW**AA**ST**IR**HW**Y**EV**LV**SV**PN**IDD**PD**DR**FL**SK**GH**AV**ALL  
*Rif15* M.....Q**M**TE**E**IR**CF**GR**MT**GD**E**K**HW**AA**ST**IR**HW**Y**EV**LV**SV**PN**IDD**PD**DR**FL**SK**GH**AV**ALL  
*consensus>70* .....e . R . l .....vLy . \$ . p . # .....rDRF . LS . GH . m .

*S. cerevisiae* α3 80 90 100 110 120 130 140 150 160 TT β2 α6

*S. cerevisiae* **Y**SH**LH**ST**Q**DL**SI**ED**K**Q**FR**QL**G**RT**Q**HP**F**EL**P**GV**EV**TT**Q**Q**Q**SN**AV**Q**W**MA**Q**AN**LAA**TY**N**...K**PF**TL**S**NY**T**V**V**LG**Q**CL  
*M.tuberculosis* **Y**Q**LI**Y**GG**GL**ES**LD**E**LA**T**W**SK**TP**NP**FR**HT**FG**VE**IT**Q**Q**Q**SN**AV**Q**W**MA**Q**AN**LAA**TY**N**...K**PF**TL**S**NY**T**V**V**LG**Q**CL  
*E.coli* **Y**SL**LH**ST**Q**DL**PM**EE**K**NF**QL**RS**K**TP**NP**FR**HT**FG**VE**IT**Q**Q**Q**SN**AV**Q**W**MA**Q**AN**LAA**TY**N**...K**PF**TL**S**NY**T**V**V**LG**Q**CL  
*H.sapiens* **Y**AV**WA**EA**GL**AE**AE**L**L**L**L**K**IS**DL**LD**GP**VP**K**Q**AF**T**D**VA**Y**Q**Q**Q**SN**AV**Q**W**MA**Q**AN**LAA**TY**N**...K**PF**TL**S**NY**T**V**V**LG**Q**CL  
*A.rifamycinica* **Y**AV**LA**AK**GI**AP**ET**DT**NR**EW**GS**PL**GM**NP**RL**TA**PG**V**IS**GS**LG**H**Q**PL**VG**AL**GL**R...AQ...GR**AR**V**V**LG**Q**GF  
*S.arenicola* **Y**AV**LA**AK**GI**AP**ET**DT**NR**EW**GS**PL**GM**NP**RL**TA**PG**V**IS**GS**LG**H**Q**PL**VG**AL**GL**R...AQ...GR**AR**V**V**LG**Q**GF  
*Rif15* **Y**AV**LA**AK**GI**AP**ET**DT**NR**EW**GS**PL**GM**NP**RL**TA**PG**V**IS**GS**LG**H**Q**PL**VG**AL**GL**R...AQ...GR**AR**V**V**LG**Q**GF  
*consensus>70* **Y**.l...G...e.l...rq.gS...HPe...pgv\$i...G.LG.GI...vG.AI...aq...d.vyv.lgDGe...M-

*S. cerevisiae* α7 170 180 190 200 210 220 230 240 β3 β4 β5 η2 β6 α9 β7

*S. cerevisiae* **Q**EG**IS**SR**ASS**LA**GH**KT**GN**IA**TY**DN**K**IT**ID**GAT**IS**DED**Y**...**K**RY**EA**Y**G**W**EL**Y**EN**GN**E**LAG**AA**A**QA**KL**SK**D**FL**IK**MT**TT  
*M.tuberculosis* **Q**EG**IV**SR**ASS**LA**AV**Q**LG**NI**IV**FD**RN**Q**IS**IED**D**NI**AL**CED**T**...**K**RY**EA**Y**G**W**EL**Y**EN**GN**E**LAG**AA**A**QA**KL**SK**D**FL**IK**MT**TT  
*E.coli* **M**EG**IV**SR**ASS**LA**GT**IK**LG**LI**AF**Y**DN**Q**IS**IED**D**NI**AL**CED**T**...**K**RY**EA**Y**G**W**EL**Y**EN**GN**E**LAG**AA**A**QA**KL**SK**D**FL**IK**MT**TT  
*H.sapiens* **R**SG**SV**EW**AM**AP**SI**Y**K**LD**NI**V**AL**LD**NI**LG**Q**SD**PA**L**Q**MD**I**Y**Q**R**CE**AF**W**H**AI**IV**D**CH...**S**VE**E**CK**AF**G**QA**...**K**HO**T**AI**IA**KT**F**  
*A.rifamycinica* **D**EG**SN**ET**MA**IG**RL**GD**RT**TA**IV**DN**SA**...**S**LG**W**GG**Q**...**L**GR**FE**LE**G**MA**TT**V**D**G...**R**HD**A**E**K**AL**T**GE**T**...**D**G**RA**V**V**LG**Q**GF  
*S.arenicola* **D**EG**SN**ET**MA**IG**RL**GD**RT**TA**IV**DN**SA**...**S**LG**W**GG**Q**...**L**GR**FE**LE**G**MA**TT**V**D**G...**R**HD**A**E**K**AL**T**GE**T**...**D**G**RA**V**V**LG**Q**GF  
*Rif15* **D**EG**SN**ET**MA**IG**RL**GD**RT**TA**IV**DN**SA**...**S**LG**W**GG**Q**...**L**GR**FE**LE**G**MA**TT**V**D**G...**R**HD**A**E**K**AL**T**GE**T**...**D**G**RA**V**V**LG**Q**GF  
*consensus>70* **d**EG...E...Aq.l.L...l.ai...dn...i.a.Rfe.GW...vdg...d...A...q...P...i...

*S. cerevisiae* η3 250 260 270 280 290 300 310 320 330 α10 TT α11 α12 α13

*S. cerevisiae* I**GY**SL**H**.A**GS**SH**VH**GA**PL**K**ADD**V**K**Q**LK**SK**FG**PN**DK**SP**VP**V**Q**EV**D**HY**Q**K**TI**L**K**PG**VE**AN**NK**W**N**K**L**F**SE**Y**Q**K**FP**EL**GA**EL**ARR**L**SG**Q**L**  
*M.tuberculosis* I**GY**PAP**N**LM**DT**G**K**A**H**GA**AL**G**DE**V**AA**V**K**IV**GF**DP**DK**TP**Q**V**RE**D**VL**TH**TR**GL**V**.A**RG**Q**A**HE**R**W**Q**LE**PD**A**WA**RR**EP**E**R**K**ALL**D**R**L**L**A**Q**L**Q**  
*E.coli* I**GF**GS**PN**K**AG**TH**D**SH**G**AP**L**G**AE**I**AL**T**R**EL**Q**W**K**Y**AP**FE**IP**SE**Y**A**Q**W**D**A**KE**A...**G**Q**A**KE**S**A**W**NE**K**F**AA**Y**A**K**AY**P**Q**E**AA**E**F**T**R**R**K**M**G**E**M**  
*H.sapiens* **K**GR**CI**TP**G**VE**D**KE**S**W**R**G**K**PL**FN**MA**EQ**II**E**I...**Y**S**Q**TS**K**K**IL**A**T**...**P**P**Q**ED**A**PS**VD**I**AN**T**R**M  
*A.rifamycinica* **P**I.....**R**EG**SA**LS**I**SV.....**D**R**K**L**M**  
*S.arenicola* **K**L.....**R**EG**SA**LS**I**SV.....**D**R**K**L**M**  
*Rif15* **P**I.....**R**EG**SA**LS**I**SV.....**D**R**K**L**M**  
*consensus>70* .....e . i . q . \$

*S. cerevisiae* η4 340 350 360 370 380 390 400 410 420 α14 β8 α15 β9 β10 β11 α20

*S. cerevisiae* P**AN**W**ES**KL**P**TY**T**A...**K**D**S**AV**AT**R**K**L**SE**V**LD**H**V**Y**N**QL**FE**I**CG**AD**TP**PS**N**L**TR**W**KE**AL**D**F**Q**PP**S**SG**S**...**G**NY**SG**RY**RY**G**IR**Q**A**  
*M.tuberculosis* P**D**GW**D**AD**L**PH**W**EP...**G**S**K**AL**A**T**R**AA**S**GA**VS**LA**GP**KL**PE**W**GG**AD**AG**S**N**NT**IK**G**AD**S**F**GP**S**I**ST**KE**Y**T**A**H**Y**GR**T**H**F**GV**R**FG  
*E.coli* P**D**FA**KA**KE**F**IA**K**L**Q**AN**PA**K**IA**SR**K**AS**Q**NA**IA**EP**GL**PE**L**IG**AD**APS**N**L**W**SG**S**K**A**IN**E**DA...**A**GN**Y**H**Y**GV**R**FG  
*H.sapiens* P**S**...L**P**SY**K**V...**G**.**D**K**I**AT**R**K**AY**Q**AL**A**K**GH**AS**DR**I**AL**D**GG**TK**NS**T**FS**E**IF...**K**...**K**EH**PD**R**FE**CI**A**Q**N**  
*A.rifamycinica* **R**V**V**F...**A**ET**V**ES**IA**A**D**PR**V**ML**T**AD**SS**W**FF**W**EV**...**K**...**K**DP**DR**V**HN**G**IR**Q**A**  
*S.arenicola* **R**V**V**F...**V**D**T**ES**IA**A**D**HP**K**V**ML**T**AD**SS**W**FF**EA**...**R**...**A**T**Y**PD**DR**V**HN**G**IR**Q**A**  
*Rif15* **R**V**V**F...**A**ET**V**ES**IA**A**D**HP**K**V**ML**T**AD**SS**W**FF**W**EV...**K**...**K**DP**DR**V**HN**G**IR**Q**A**  
*consensus>70* .....e . v . e . l . . . . . p . v . . . . . ad . . . . . K . . . . . r . . . . . Eg!rE.a

*S. cerevisiae* α16 430 440 450 460 470 480 490 500 β12 α17 η5 α18 β13 η6 α19 β14 α20

*S. cerevisiae* M**GA**IN**Q**IS**AF**AN**Y**FP**Y**GG**F**LN**V**Y**AA**GA**V**RS**AL**SG**HP**VI**W**ATH**D**IG**V**ED**GP**TH**Q**PI**E**L**A**H**FR**S**PN**I**Q**W**R**AD**GN**VS  
*M.tuberculosis* M**GA**IL**SG**IV**LR**LP**TR**AY**GG**FL**Q**S**Y**MR**PA**VR**LA**AL**MD**ID**IY**W**TH**D**S**IG**L**ED**GP**TH**Q**PI**E**L**S**LA**R**AP**RL**SV**R**AD**AN**TA  
*E.coli* M**TA**IN**IS**L**H**GG**FL**PY**TS**FL**Q**Y**AR**NA**VR**MA**AL**M**K**QR**Q**VM**V**Y**TH**D**S**IG**L**ED**GP**TH**Q**PI**E**Q**V**AS**LR**VP**NP**ST**WR**CD**Q**VS**EA**  
*H.sapiens* M**V**SI**AV**GC**AT**R**N**R**TV**FP**CS**FA**AF**TR**AF**D**Q**IR**MA**AI**SE**SN**IL**CG**SH**CG**VS**IG**ED**GP**Q**MA**LE**D**L**AM**FR**S**VP**TS**TV**FP**SD**GV**AT**  
*A.rifamycinica* M**DI**AC**GF**AL**AG**...**Q**R**FP**V**VH**Y**AP**PI**R**FP**FE**Q**L**KL**DL**GH**Q**VG**AV**LV**SV**GA**S**Y**DD**Y**DD**LAG**CR**TH**Q**AP**GD**VA**LD**TR**GW**Y**V**Y**V**GH**ED**VA  
*S.arenicola* M**DI**AC**GF**AL**AG**...**Q**R**FP**V**VH**Y**AP**PI**R**FP**FE**Q**L**KL**DL**GH**Q**VG**AV**LV**SV**GA**S**Y**DD**Y**DD**LAG**CR**TH**Q**AP**GD**VA**LD**TR**GW**Y**V**Y**V**GH**ED**VA  
*Rif15* M**DI**AC**GF**AL**AG**...**Q**R**FP**V**VH**Y**AP**PI**R**FP**FE**Q**L**KL**DL**GH**Q**VG**AV**LV**SV**GA**S**Y**DD**Y**DD**LAG**CR**TH**Q**AP**GD**VA**LD**TR**GW**Y**V**Y**V**GH**ED**VA  
*consensus>70* \$ . i . a . G . l . g . . . . . p . T . . . . . F . . . . . e . v . l . . . . . d . . . . . vlv . . . . . s . . . . . G . thq . . . . . d . a . . . . . P . . . . . v . . . . . de . .

*S. cerevisiae* α20 510 520 530 540 550 560 570 580 β15 α21 β16 β17 α22 β18

*S. cerevisiae* A**Y**KN**S**LE**SK**H**T**PS...**I**AL**SR**Q**N**L**P**Q**EG**S...**S**TES**AS**K**GY**V**Q**D**VA**...**N**PD**I**L**VA**Q**SE**V**S**LE**W**AK**T**L**A**KN**R**K**AR**V**VS**  
*M.tuberculosis* Y**A**WR**T**L**ARR**N**G**SG**P**V**G**I**L**T**R**Q**N**L**P**V**DD**T...**D**A**E**Q**AR**AG**Y**V**S**D**AG**L**Q**P**G**E**EP**D**V**L**IA**T**Q**SE**V**Q**L**AV**A**Q**TL**L**AD**N**D**L**AR**V**VS**  
*E.coli* V**A**W**K**Y**G**VE**R**Q**D**GP**T**...**A**I**L**SR**Q**N**L**A**Q**ERT**E**EQ**L**AN**AG**Y**DC**AG...**Q**PE**L**PI**A**T**Q**SE**V**EL**AV**A**Y**E**K**L**EG**K**TR**V**VS**  
*H.sapiens* K**A**VE**L**AA**N**TK**G**IC...**F**RT**SR**FN**AI**Y**N**N**ED**F**Q**Q**AK**V**LS**K...**D**D**Q**V**T**IG**AV**TH**EL**AL**A**E**L**KE**K**EN**T**R**V**LD  
*A.rifamycinica* P**L**SK**A**T**AG**DN**RV**...**Y**RL**ER**AN**SE**AV**V**...**V**SD**FT**V**LR**GG**A**...**G**V**V**V**A**Y**GP**V**DD**V**LA**T**ST**V**V**Y**V**AS**TR**  
*S.arenicola* P**L**MR**D**AL**S**AD**G**RV...**Y**RL**ER**AN**SE**AV**V**...**V**LD**FT**V**LR**GG**A**...**G**V**V**V**A**Y**GP**V**DD**V**LA**T**ST**V**V**Y**V**AS**TR**  
*Rif15* P**L**LS**K**A**T**AG**DN**RV...**Y**RL**ER**AN**SE**AV**V**...**V**SE**K**FT**V**LR**G**KA...**G**V**V**V**A**Y**GP**V**DD**V**LA**T**AT**AD**TV**Y**V**AS**TR**  
*consensus>70* .....l . s . . . . . v . g . vL . . . . . i . va . G . . . . . d . . . . . e . a . . . . . a . v .

*S. cerevisiae* α21 590 600 610 620 630 640 650 660 β19 η7 β20 α25 α26

*S. cerevisiae* L...P**F**FT**FD**K**Q**P**L**E**Y**LS**V**LP**DN**V**P**...**M**SV**E**VL**AT**TC**W**GY**A**H**Q**S...**F**G**I**D**R**F**G**A**S**K**AP**V**F**FP**FT**P**G**V**A**ER**Q**K**T**IA  
*M.tuberculosis* M...P**C**LE**W**FA**Q**PY**E**Y**DA**V**L**P**PT**V...**S**AV**VE**AG**AC**Q**W**H**L**V**GD**T**GE**I...**V**SE**I**HY**G**ES**AD**H**K**L**P**RE**V**Y**FT**AE**AV**AA**A**ER**AL**D  
*E.coli* M...P**S**DA**F**D**K**Q**D**AA**Y**E**S**V**L**P**K**AV...**T**AV**VE**AG**AD**Y**W**Y**K**V**GL**NG**AI**...**V**GM**T**TF**G**ES**AP**ELL**PE**EP**FT**Y**N**V**V**AK**EL**  
*H.sapiens* P**F**TI**K**PL**R**KL**L**DS**AR**A**T**GR**IL**TV**ED**HY**E**GG**E**GE**A**...**S**SA**V**VG**EP**GI**T**V**TR**...**L**AV**N**R**V**RP**S**K**P**AL**L**AMP**CI**D**R**DA**A**Q**AV**R...  
*A.rifamycinica* P...F**H**AG**L**RA**AV**TA**AP**N**V**V**L**VE**P**...**Y**LG**T**SA**FE**T**E**AL**GD**V**PH**RL**S**F**G**T**WR**D**R**EA**RV**...**K**AL**D**H**L**...**V**AS**TR**  
*S.arenicola* P...F**H**AG**L**RA**AV**TA**AP**N**V**V**L**VE**P**...**Y**LG**T**SA**FE**T**E**AL**GD**V**PH**RL**S**F**G**T**WR**D**R**EA**RV**...**K**AL**D**H**L**...**V**AS**TR**  
*Rif15* P...F**H**AG**L**RA**AV**TA**AP**N**V**V**L**VE**P**...**Y**LG**T**SA**FE**T**E**AL**GD**V**PH**RL**S**F**G**T**WR**D**R**EA**RV**...**K**AL**D**H**L**...**V**AS**TR**  
*consensus>70* .....d . . . . . e . . . . . l . . . . . v . e . . . . . g . . . . . e . . . . . e . . . . .

*S. cerevisiae* 670 680 TT

*S. cerevisiae* F**Y**K**G**D**K**L**I**S**P**L**K**K**A**F  
*M.tuberculosis* .....N  
*E.coli* .....L  
*H.sapiens* .....G  
*A.rifamycinica* .....V  
*S.arenicola* .....F  
*Rif15* .....G  
*consensus>70* .....

**Supplementary Figure 7** Protein sequence alignment of Rif15 and six other transketolases. The transketolases are from *Sacchromyces cerevisiae*, *Mycobacterium tuberculosis*, *Escherichia coli*, *Homo sapiens*, *Amycolatopsis rifamycinica* (rifamycin producer), and *Salinispora arenicola* (rifamycin producer). Sequence analysis was performed using Expresso through the T-COFFEE online service, and the figure was prepared by ESPript 3.0<sup>2,3</sup>. The secondary structures of the structurally characterized transketolase from *S. cerevisiae* are shown on the top of sequences. The  $\eta$  symbol represents a  $3_{10}$ -helix.  $\alpha$ -Helices and  $\beta$ -strands are indicated as helices and black arrows, respectively. The three domains of *S. cerevisiae* transketolase apoprotein including PP domain (residues 3-322), Pyr domain (residues 323-538) and C-terminal domain (residues 539-680) are divided by yellow arrows. The transketolases from three rifamycin producers are composed of two subunits, while the rest transketolases are single polypeptides. For the purpose of sequence alignment, the two subunits are artificially connected into one protein, and the purple dash line points out the start of the second subunit. The residues highlighted in red and yellow are amino acids that are mutually identical and similar, respectively. The blue triangles denote the residues that interact with ThDP. The symbols of  $M^{2+}$  in red indicate the residues that contact the divalent metal ion.

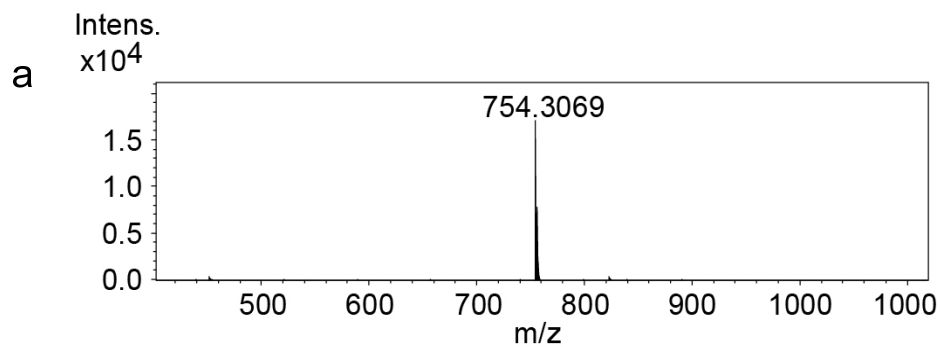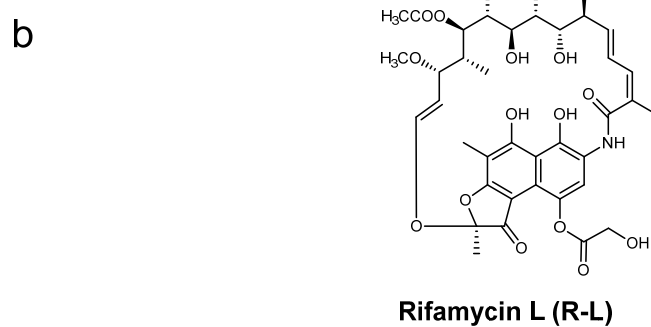

**Supplementary Figure 8** The high resolution mass spectrum of R-L. **a** The high resolution mass spectrum (negative ion mode) of R-L. **b** The chemical structure of R-L.

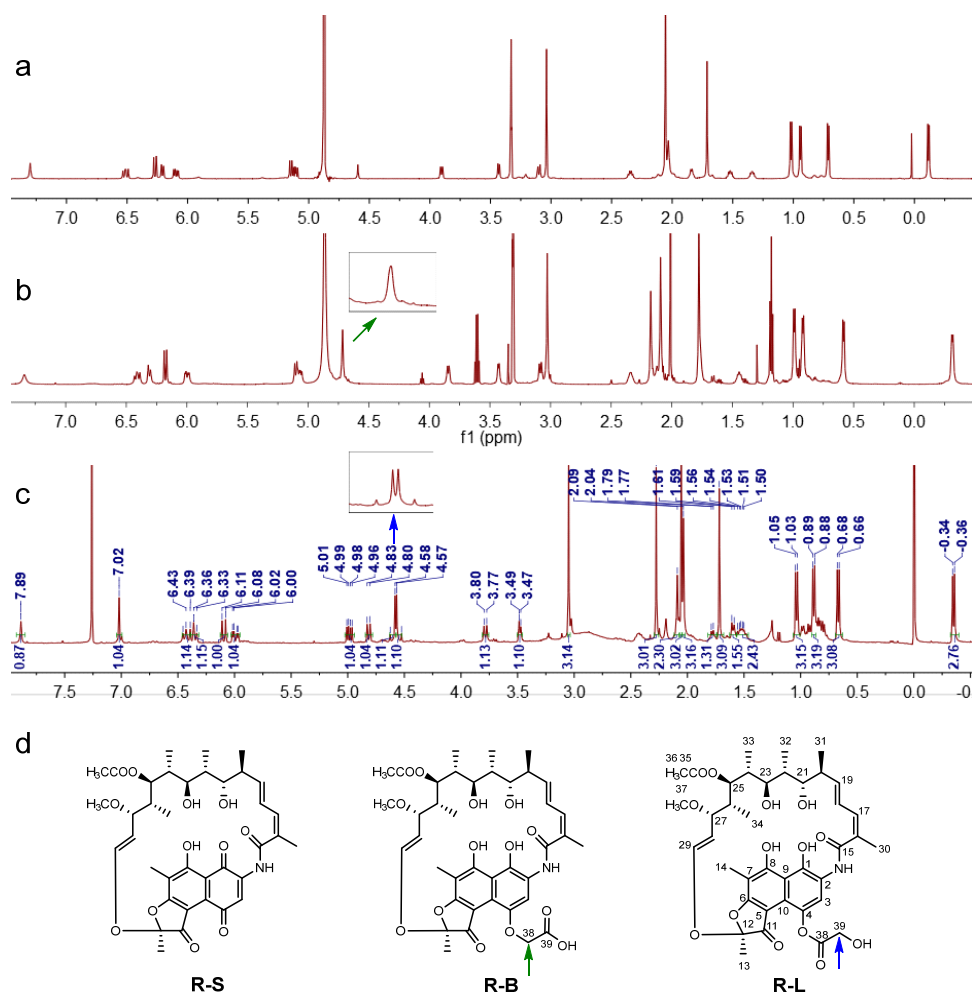

**Supplementary Figure 9**  $^1\text{H}$  NMR spectra of R-S, R-B, and R-L. **a** The  $^1\text{H}$  NMR spectrum of R-S (in  $\text{CD}_3\text{OD}$ , 600 MHz). **b** The  $^1\text{H}$  NMR spectrum of R-B (in  $\text{CD}_3\text{OD}$ , 600 MHz). **c** The  $^1\text{H}$  NMR spectrum of R-L (in  $\text{CDCl}_3$ , 500 MHz). **d** Chemical structures of R-S, R-B and R-L. The blue arrow indicates the new set of  $\text{CH}_2$ -39 proton signals of R-L, which are distinct to that of R-B (the green arrow).

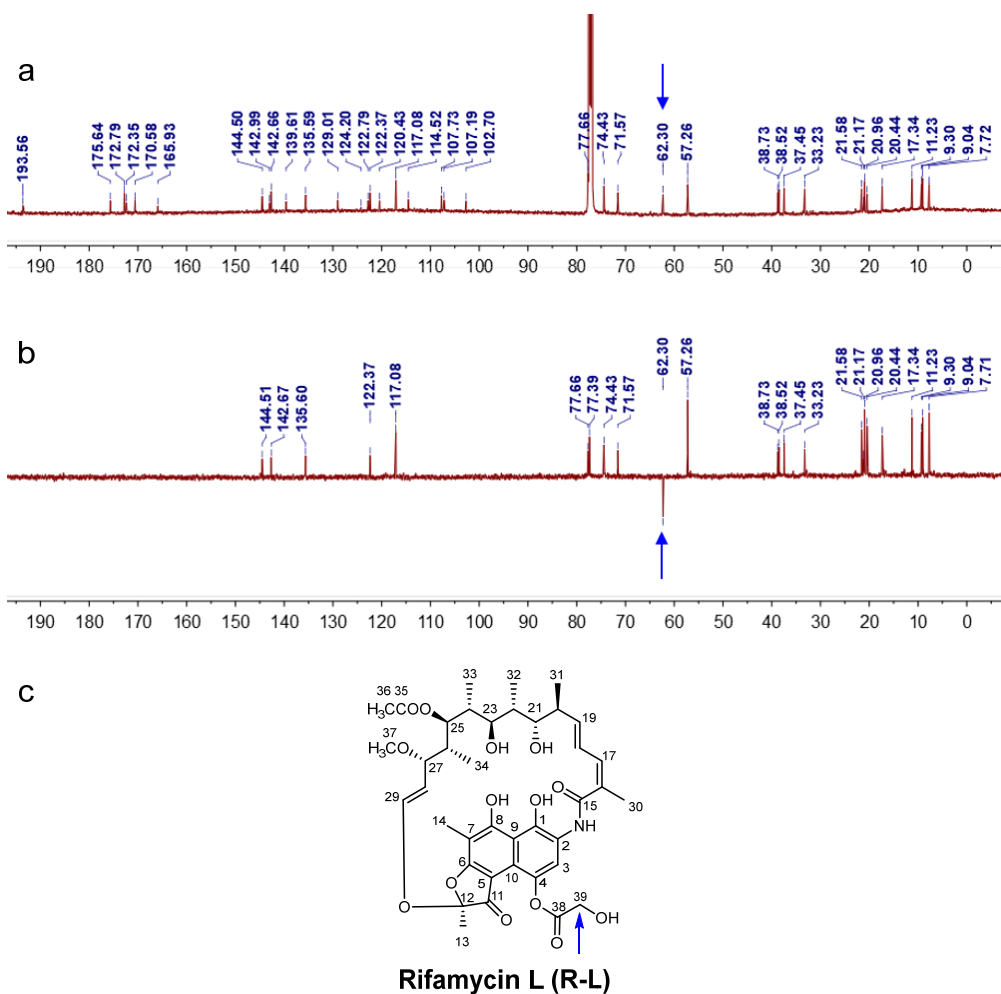

**Supplementary Figure 10**  $^{13}\text{C}$  NMR and DEPT135 spectra of R-L. **a** The  $^{13}\text{C}$  NMR spectrum of R-L in  $\text{CDCl}_3$  (125 MHz). **b** The DEPT135 spectrum of R-L in  $\text{CDCl}_3$  (125 MHz). **c** The chemical structure of R-L. The arrows indicate the  $\text{CH}_2$ -39 carbon signals of R-L.

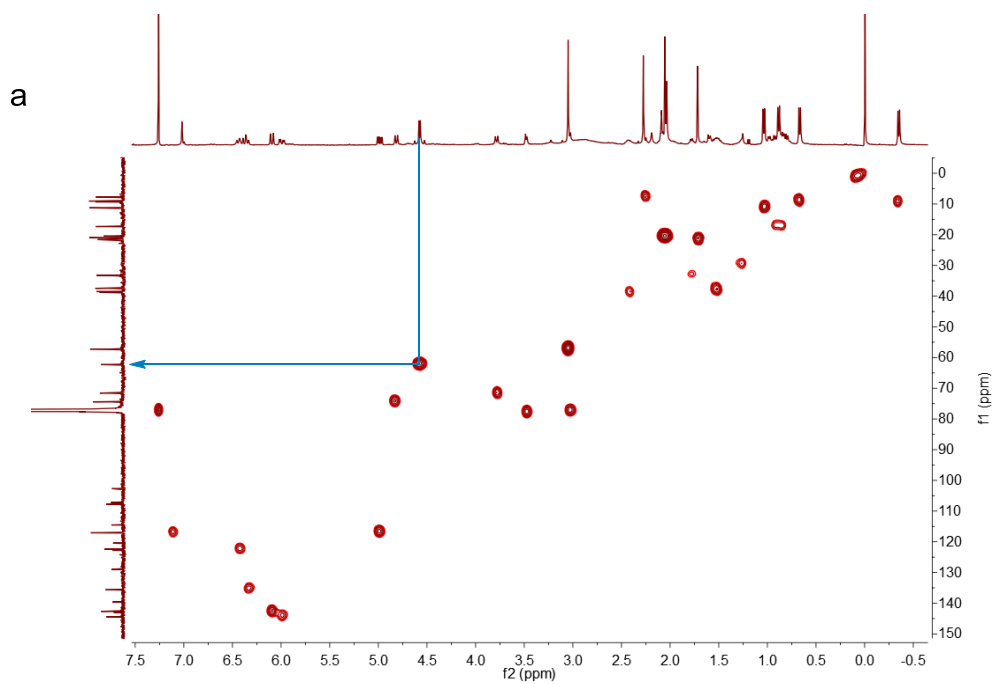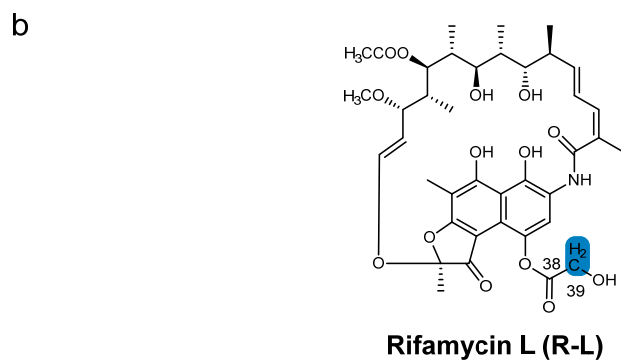

**Supplementary Figure 11** HSQC spectrum of R-L. **a** HSQC spectrum of R-L in  $\text{CDCl}_3$ . The arrow indicates the  $^1\text{H}$ - $^{13}\text{C}$  HSQC correlation of  $\text{CH}_2$ -39. **b** The chemical structure of R-L.

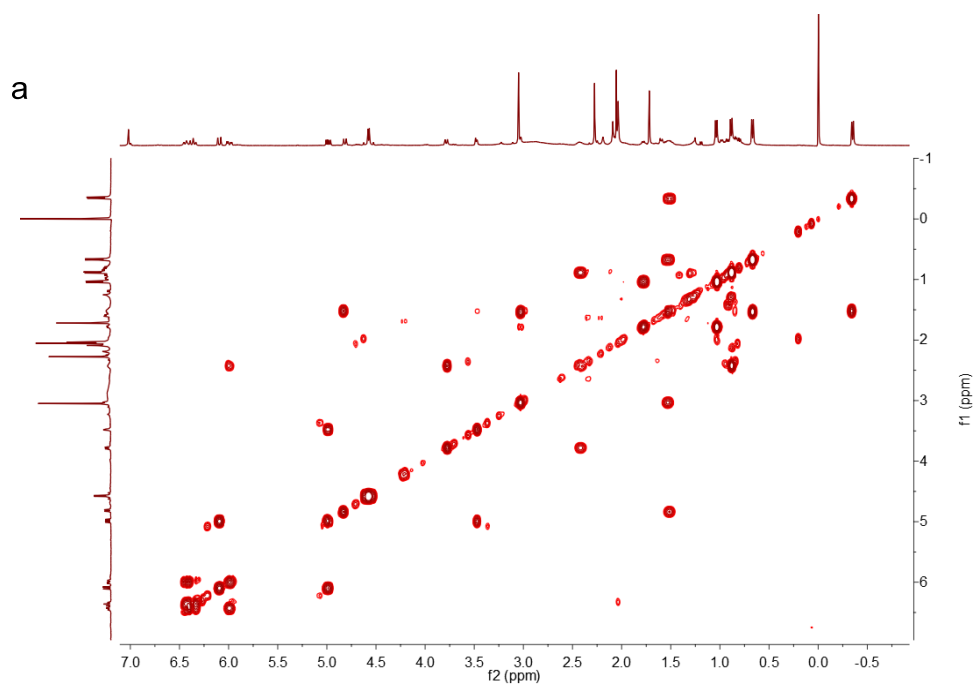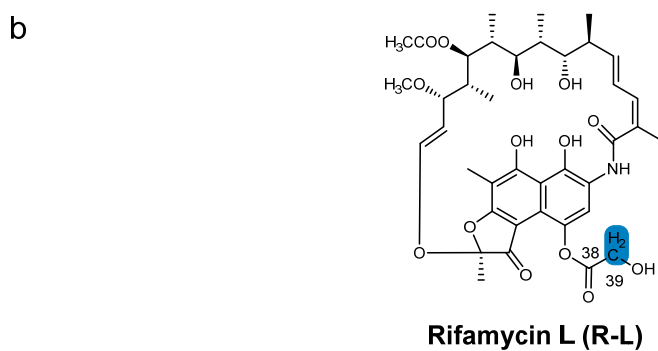

**Supplementary Figure 12**  $^1\text{H}$ - $^1\text{H}$  COSY spectrum of R-L. **a**  $^1\text{H}$ - $^1\text{H}$  COSY spectrum of R-L in  $\text{CDCl}_3$ . No  $^1\text{H}$ - $^1\text{H}$  COSY correlation could be observed for H<sub>2</sub>-39 except for their geminal coupling. **b** The chemical structure of R-L.



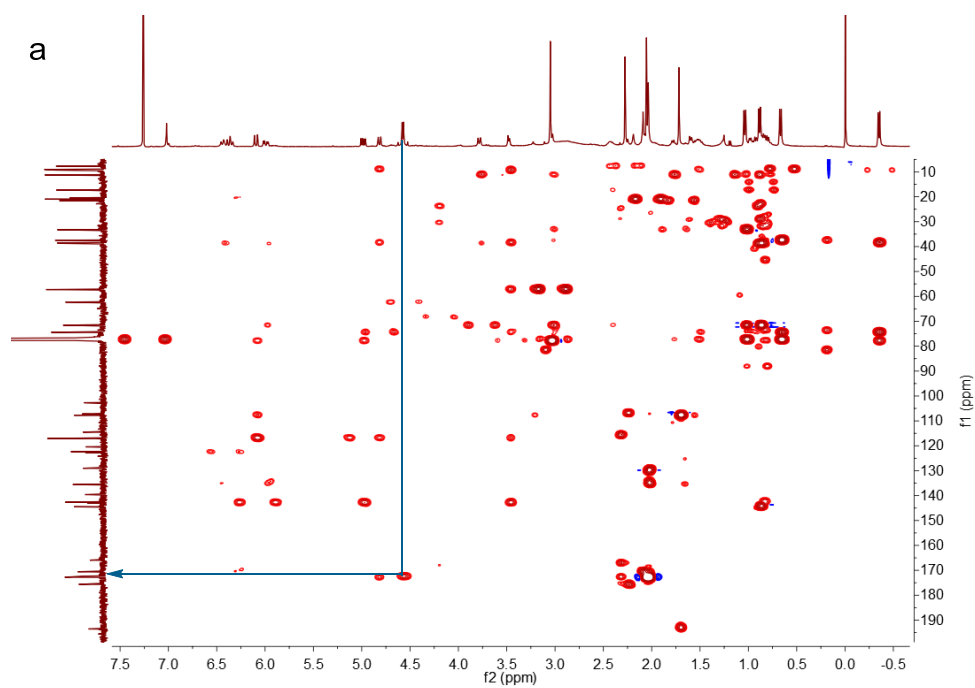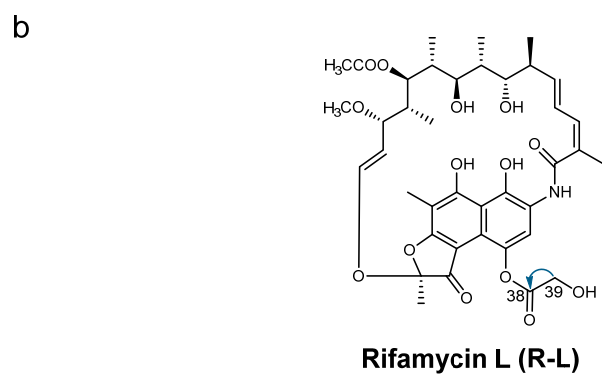

**Supplementary Figure 13** HMBC spectrum of R-L. **a** HMBC spectrum of R-L in  $\text{CDCl}_3$ . The arrow indicates the  $^1\text{H}$ - $^{13}\text{C}$  HMBC correlation from H<sub>2</sub>-39 to C-38. **b** The chemical structure of R-L.

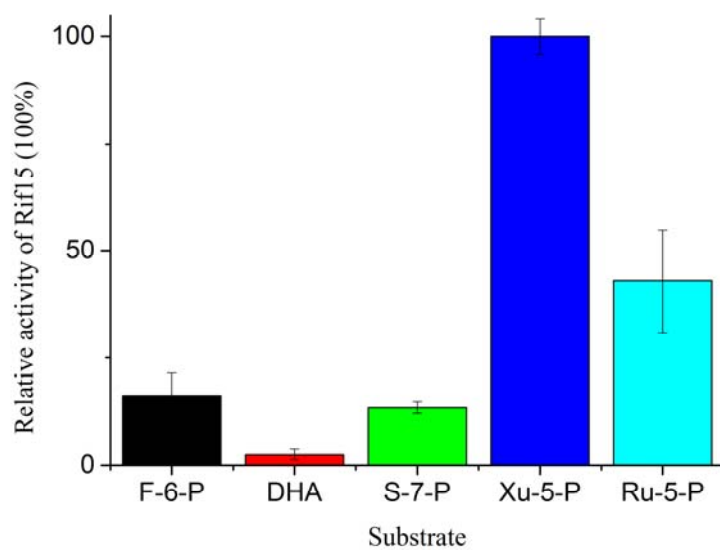

**Supplementary Figure 14** The activity of the transketolase Rif15 with different C<sub>2</sub> donors. All the data are means  $\pm$  s.d. ( $n=3$ ). (fructose-6-phosphate, F-6-P; dihydroxyacetone, DHA; sedoheptulose-7-phosphate, S-7-P; xylulose-5-phosphate, Xu-5-P; ribulose-5-phosphate, Ru-5-P)



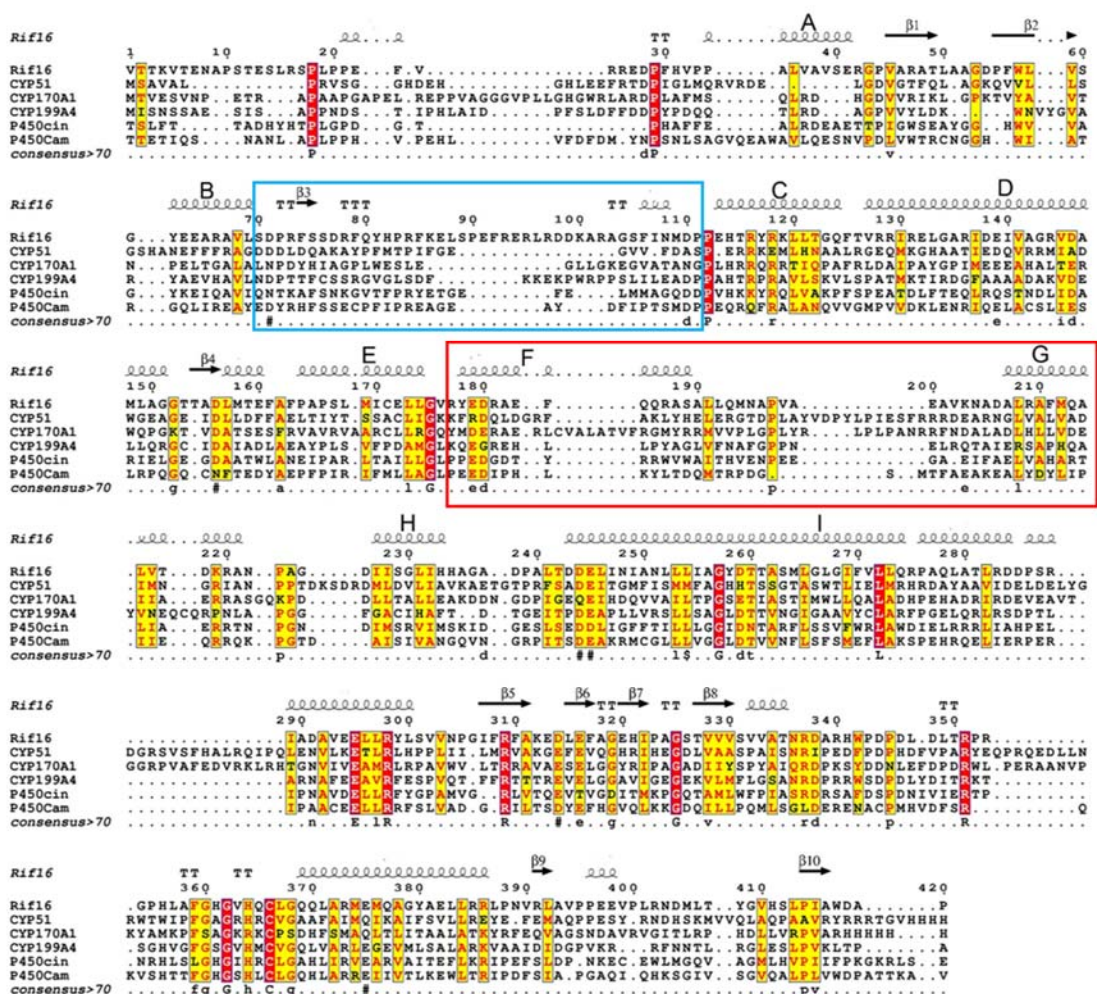

**Supplementary Figure 16** Multiple protein sequence alignment between Rif16 and other P450 enzymes with their substrates different in size and shape. The substrates of Rif16, CYP51, CYP170A1, CYP199A4, P450cin, and P450cam are rifamycin L (*m.w.* 755.8), 4,4'-dihydroxybenzophenone (*m.w.* 214.2)<sup>4</sup>, *epi*-isozizaene (*m.w.* 204.4)<sup>5</sup>, 4-methoxybenzoic acid (*m.w.* 152.15)<sup>6</sup>, 1,8-cineole (*m.w.* 154.2)<sup>7</sup>, and camphor (*m.w.* 152.2)<sup>8</sup>, respectively. Sequence analysis was performed using Expresso through the T-COFFEE online service, and the figure was prepared using ESPrnt 3.0<sup>2,3</sup>. The secondary structure assignment and residue numbering are based on the sequence of Rif16. The BB' loop-B' helix-B'C loop region and the F helix-FG loop-G helix region are boxed in blue and red rectangles, respectively.

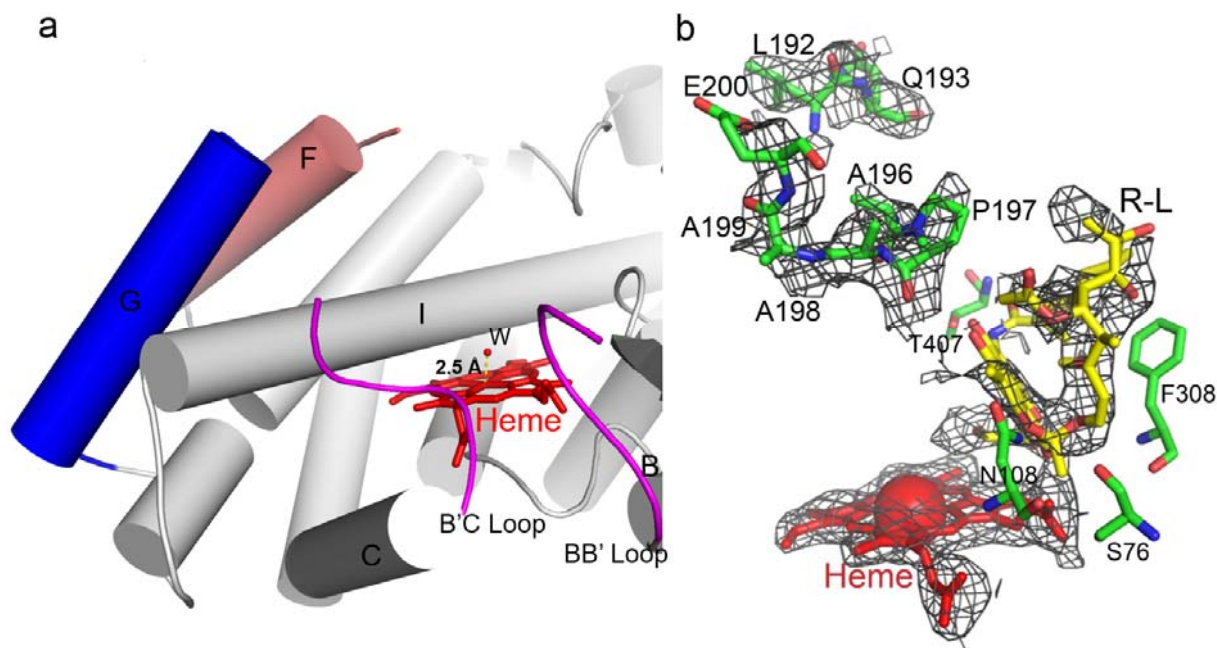

**Supplementary Figure 17** Structures of Rif16. **a** Substrate-free Rif16. The axial water ligand is shown as sphere in red. The distance (in angstroms) is indicated by the dashed yellow line. The heme group is shown as a stick in red. **b** The electron-density map of the complex structure. The substrate R-L and heme are shown as sticks in yellow and red, respectively, with the heme iron depicted as a sphere. Key residues that are important for substrate binding are colored in green. The 2Fo-Fc density maps of heme and substrate are contoured at  $1.0 \sigma$  and  $0.8 \sigma$ , respectively. The density map of the residues in the ordered F/G loop upon R-L binding is contoured at  $1.0 \sigma$ .

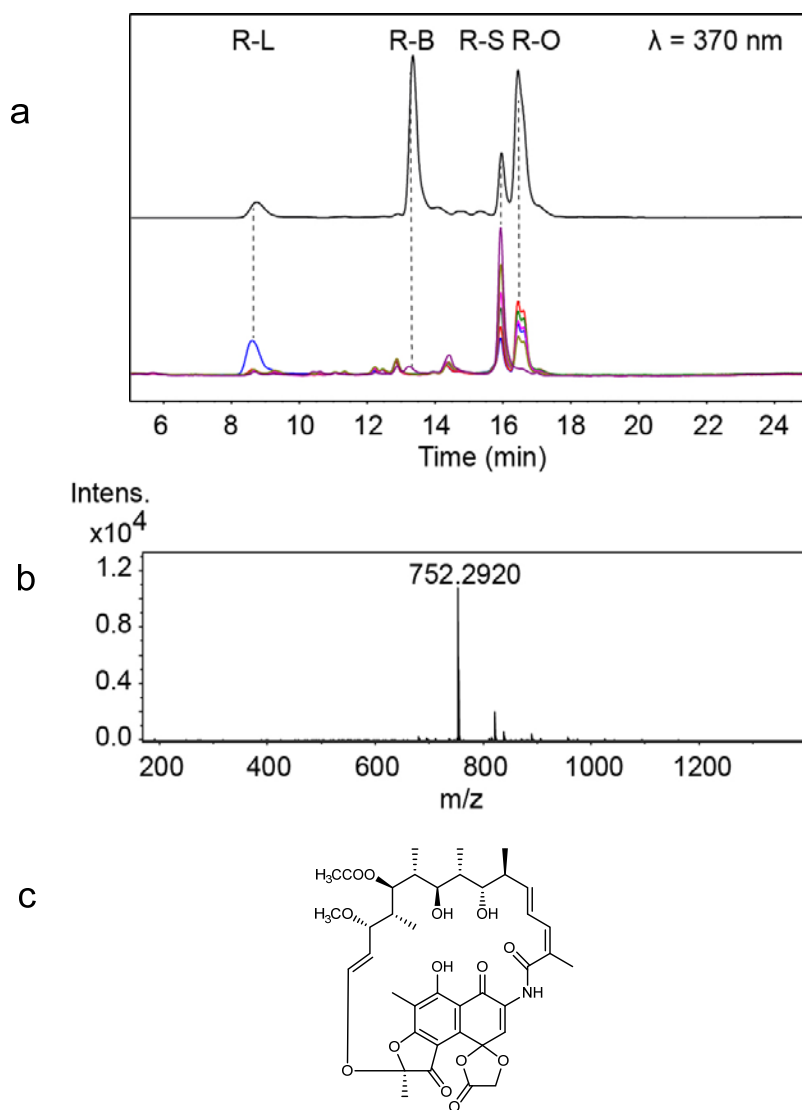

**Rifamycin O (R-O)**

**Supplementary Figure 18** HPLC-HRMS analysis of the transient intermediate (R-O) between R-L and R-B. **a** The time course of Rif16 reactions with R-L in the presence of H<sub>2</sub>O<sub>2</sub>. All reactions were performed in 200  $\mu$ L of reaction buffer containing 2  $\mu$ M Rif16, 200  $\mu$ M rifamycin L, and 20 mM H<sub>2</sub>O<sub>2</sub> at 28  $^{\circ}$ C for the indicated time period, and quenched by adding the same volumes of methanol. Black line: The mixed R-L, R-B, R-S and R-O standards; Blue line: 2.5 min reaction; Red line: 5 min reaction; Green line: 10 min reaction; Magenta line: 15 min reaction; Yellow green line: 30 min reaction; Purple line: 60 min reaction. **b** The high resolution mass spectrum (negative ion mode) of R-O. **c** The chemical structure of R-O.



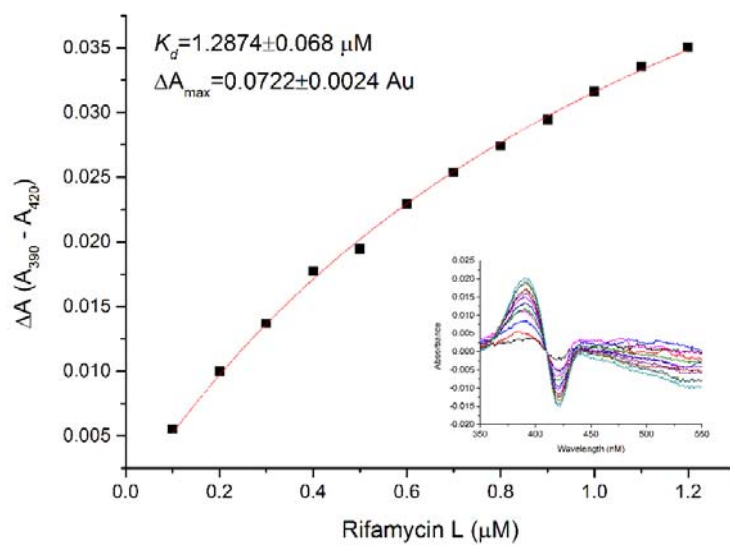

**Supplementary Figure 20** The substrate binding curve R-L toward Rif16. The inset shows the recorded Type I binding spectra. The concentration of Rif16 is 1  $\mu\text{M}$ .



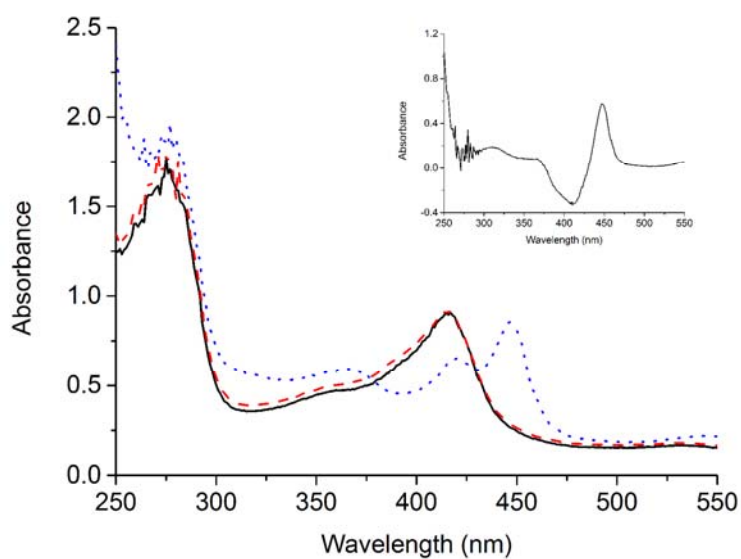

**Supplementary Figure 21** UV-visible absorption spectra of purified Rif16R84W. Ferric form (black solid line), CO-saturated form (red dash line), sodium dithionite reduced and CO-bound form (blue dot line). The CO-bound reduced difference spectrum is shown in inset. This spectrum was also used to determine the concentration of functional P450 enzyme using the extinction coefficient of  $91,000 \text{ M}^{-1} \cdot \text{cm}^{-1}$ .

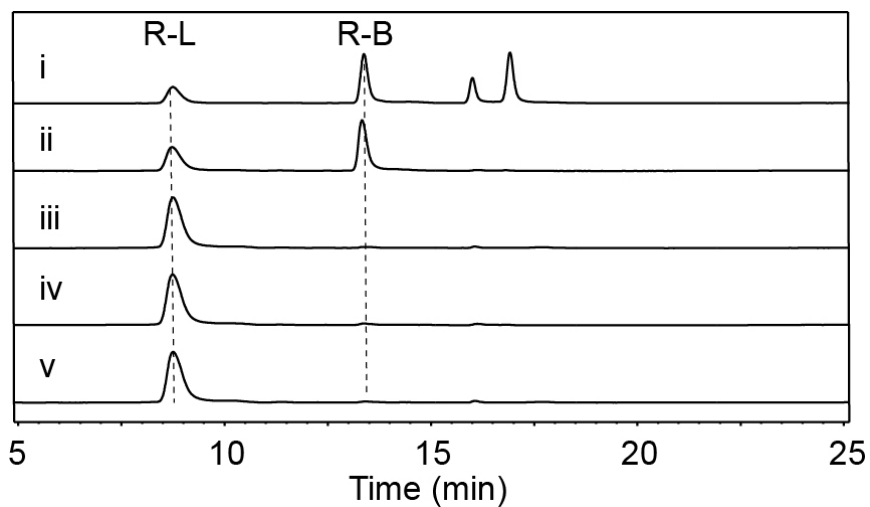

**Supplementary Figure 22** HPLC analysis of the reactions catalyzed by Rif16<sub>R84W</sub>. (i), The mixed R-L, R-B, R-S, and R-SV standards; (ii), R-L with Rif16 in the presence of *seFdx*, *seFdR*, and NADPH; (iii), the negative control of (ii) with the omission of NADPH; (iv), R-L with Rif16<sub>R84W</sub> in the presence of *seFdx*, *seFdR*, and NADPH; (v), the negative control of (iv) with the omission of NADPH.

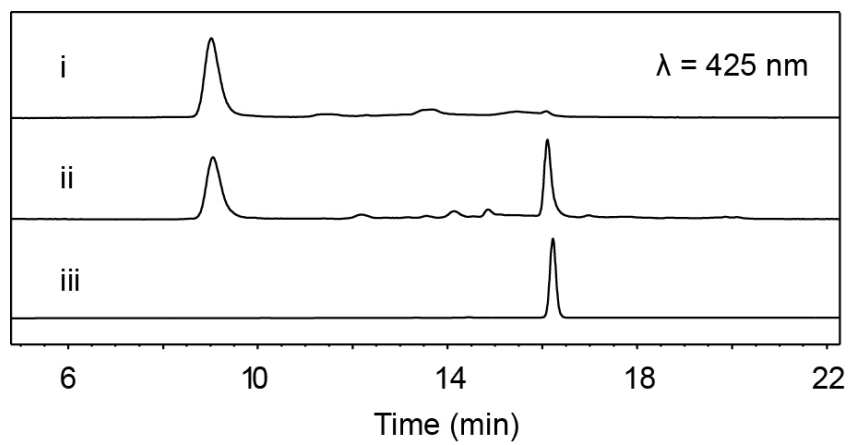

**Supplementary Figure 23** HPLC analysis of R-L degradation. (i), R-L newly prepared. (ii), R-L incubated in reaction buffer (vol:vol = 1:99), at 37 °C for 1 day. (iii), R-S authentic standard.

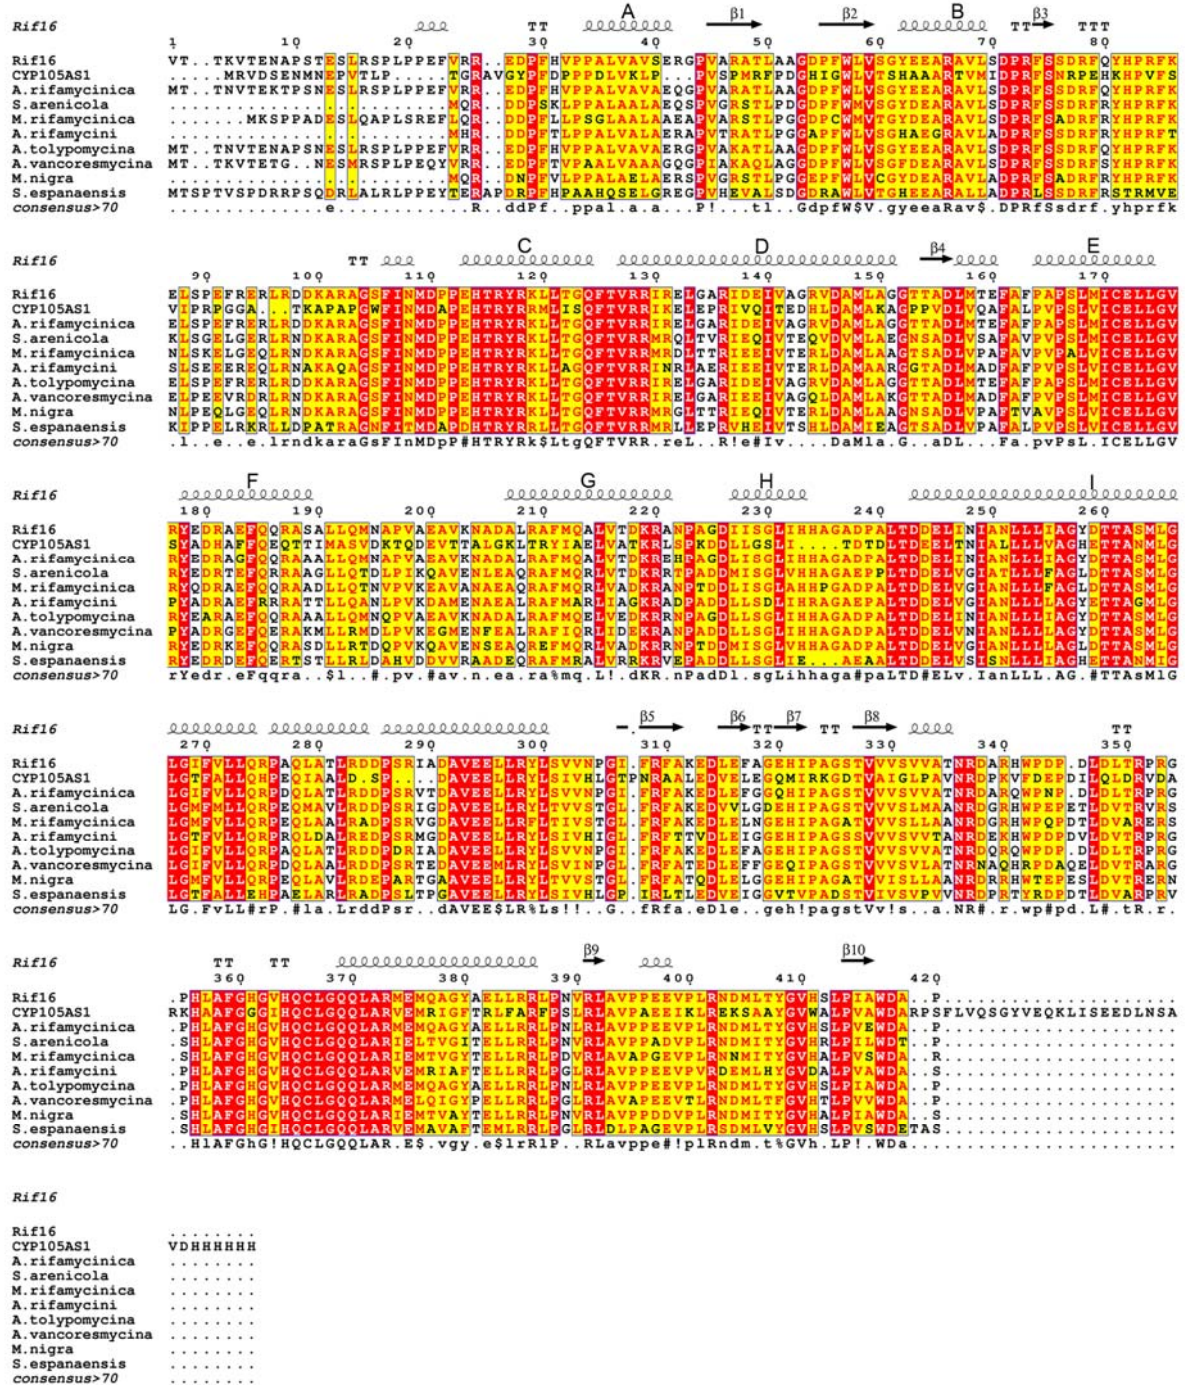

**Supplementary Figure 24** Protein sequence alignment of Rif16 and a select number of its analogous P450 enzymes, which are from *Amycolatopsis orientalis* (CYP105AS1, the closest structurally characterized Rif16 homologue), *Amycolatopsis rifamycinica*, *Salinispora arenicola*, *Micromonospora rifamycinica*, *Actinomadura rifamycinini*, *Amycolatopsis tolypomycina*,

*Amycolatopsis vancoresmycina*, *Micromonospora nigra*, and *Saccharothrix espanaensis*, respectively (see Supplementary Table 3). Sequence analysis was performed using Espresso through the T-COFFEE online service, and the figure was prepared by ESPript 3.0<sup>2,3</sup>. The secondary structure assignment and residue numbering are based on the sequence of Rif16. The capital letters and helices on the top of sequences represent  $\alpha$ -helices, and the  $\beta$ -strands are indicated as black arrows.

## Supplementary Tables

**Supplementary Table 1** The nucleotide sequences of *rif15* and *rif16*. Blue letters and green letters indicate the sequences of *rif15a* and *rif15b*, respectively. Red letters denote the overlapped *rif15a* stop codon and *rif15b* start codon. Black letters are the sequence of *rif16*. The cytosine highlighted in yellow is mutated to a thymine in *A. mediterranei* U32, leading to the null mutant Rif16<sub>R84W</sub>.

---

---

*rif15* (AMED\_0651 and AMED\_0652)

---

ATGCAGATGACCGAAGAGAACCTCCGCGGCCTGTTCCGGCCGGATGACGGGGGACGAGAAGCACGGCTG  
GGCCGCGGCGTGCACATTGCACGCGATCTGGGTGCTCTACGAACGCGTGTCAACGTGTCGCCGTCGAA  
CATCGACGACCCCCGGCCGGGACCGGTTCTACCTCTCCAAGGGACACGGCCCGATGGCCTACTACGCGGT  
GCTCCGCCGGAAGGGCTTCATCGAGCCGGAACCGTGGACACCTGGCGGCAGTGGGGTTCGCCGCTGG  
GCATGCACCCGACCGCAACCTGGCGCCCGCGGTGGAGATCAGCAGCGGCTCCCTCGGCCACGGGCTCC  
CGCTCGGCGTCCGACCCGCGCTCGGGCTGCGCGCCCAGGGCCGCGACGCCCGCGTGGTTCGTCCTGATG  
GGCGACGGCGAGTTCGACGAGGGCAGCAACCACGAGACGATGGCGATCGCCGGACGGCTCGGGCTGGG  
CAGCCTCACCGCGGTGTCATCGACAACAAGACGGCGAGCCTCGGCTGGCCGGGCGGCATCGCCGGGC  
GCTTCGAACAGGAGGGCTGGGCCGCCACCACGGTTCGACGGCCGCGACCACGACGCGCTGGAGAAGGGC  
CTGACCCGGGAGACCCGACGGGCGCGCGGTCATCGCGGAGATCCTCCCGATCGAGGAAGGGAG  
CACCGCATGACCGCCAGGTGACCAGGAAGCAGATGCGGACCGTCTTCGCCGAGACGGTGATCGAGTCG  
CTGGCCACGGACCCGCGCGTGGTTCATGCTGACCGCCGACATCTCGTTCGTGGTTCCTTGGGAGGTCAAG  
AAGGACTTCCCGGACCCGCTCCACAACCTTCGGCATCCCGGAGCAGGCGATGATCGACATCGCCGGCGGC  
TTCGCGCTGGCCGGCCAGCGCCGGTGGTGCACACGTACCGCGCCGTTCCTGGTTCGAGCGGCCGTTTCGAG  
CAGATCAAGATCGGCCTCGGCCACCAGGACGTCGGCGCGGTGCTGGTTCAGCGTGGGGCCTCCTACGAC  
GACCCGTCGTGGGGCCGACCCACCAGGCCCGGGCGACGTCGGCGTGGTTCGGAACGCTGCGGGGCTG  
GACGGTGCACGTCCTCCGGGCCACGAGGACGAGGTGCGCGCCCTGCTGAGCAAGGCCATCGCGGGTGACA  
ACCGGGTCTACGTCCGGCTGTCCGAACGCGCGAACAGCGAAGCGGTGCCGGTGTTCGAGAAAGTTCACGG  
TGCTGCGCCGGGGCAAGGCGGGCGTGGTGTTCGCGGTTCGGCCGGTGTTCGACAGGTCTTCGGCGCC  
ACGGCCACGGCGGACGTGACGGTGTGTACGCTCGACGATCCGCCCGTTCGACCACGCGGGCCTCCGG  
GAGGCGGTGGCCGCGGCGGCCCGAACGTTGGTGTTCGAGCCGTACCTGCGCGGGACGTCGGCGTT  
CGAGGTGACCGAGGCTCTGGGAGACGTCGCCGACCCGCTGCGCTCGTTCGGAACCTGGCGCGACCCGCA  
AGCCCGCTTACGGAACCGGAAACACGACCCGCTGTTCCGGCGTGGACGCCGAGTCGCTGGCGGA  
TTCGATCGCCCGCTTCGTCGGCTGA

---

*rif16*

---

GTGACGACCAAAGTGACCGAAAAACGCGCCAGCACCGAATCGCTGCGCTCACCCTCCCTCCGGAGTTC  
GTCCGGCGCGAAGACCCGTTCCACGTGCCGCCGCTTTGGTGGCCGTCTCCGAACGGGGTCCCGTCCGC  
CGGGCGACACTGGCCGCCGGCGACCCGTTCTGGCTCGTGTCCGGGTACGAGGAAGCGCGCGCGGTGCT  
GTCGGACCCGCGCTTTTCCCTCCGACCGGTTCCAGTACCACCCGCGGTTCAAGGAAGTTCGCCCCGAATTC  
CGGGAGCGCCTGCGGGACGACAAAGCGCGCGCGGGTTCATCAACATGGACCCGCCGAGCACAC  
CCGGTACCGGAAACTGCTCACCGGCAGTTACCGTCCGGCGGATCCGCGAGCTCGGCGCCCCGGATCGA  
CGAGATCGTCGCCGGCCGGGTGGACGCCATGCTGGCCGGCGGGACCACCGCCGACCTGATGACCGAATT  
CGCGTTTCCGGCGCCTTCGCTGATGATCTGCGAGCTGCTCGGGGTGCGGTACGAGGACCGGGCGGAGTT  
CCAGCAGCGCGCTCGGCCCTGCTGCAGATGAACGCCCGGTGCGGAGGCGGTGAAGAACGCCGACG  
CCCTGCGCGGTTTCATGCAGGCGCTGGTACGGACAAGCGGGCGAACCCGGCGGGCGACATCATCTCCG  
GCCTGATCCACCACGCCGGCGCCGACCCCGCGCTCACCAGCAGGAGCTGATCAACATCGCCAACCTGC  
TGCTCATCGCCGCTACGACACCACGGCGAGCATGCTGGGGTGGGCATCTTCGTGCTGCTGCAGCGCC  
CCGCCAGCTCGCCACGCTGCGCGACACCCGTTCCGCATCGCCGACGCGGTTCGAGGAGCTGCTGCGCT  
ACCTGTCCGTGGTGAACCCGGGGATCTTCCGCTTCGCAAGGAGGACCTGGAGTTCGCCGGCGAGCACA  
TCCCGGCCGGTTCGACGGTGGTGGTCTCCGTGGTGGCGACCAACCAGCGACGCGCGGCACTGGCCGGAC  
CGGACCTCGACCTGACCCGCCCCCGCGGCCCCACCTGGCGTTCGGCCACGGCGTGCACCAGTGCCTCG  
GCCAGAGCTGGCCCGGATGGAGATGCAGGCGGGCTACGCCGAGCTGCTGCGCCGCTGCCGAACGTT  
GCCTGGCGGTGCCCGCGAGGTTCCGCTGCGCAACGACATGCTGACTTACGGGGTGCACCTCGCTTC  
CGATCGCCTGGGACGCTCCCTAA

---

---

**Supplementary Table 2**  $^1\text{H}$  (600 MHz) and  $^{13}\text{C}$  (150 MHz) NMR data for R-L and R-B in  $\text{CD}_3\text{OD}$

| Position | R-L                 |                                  | R-B                  |                               |
|----------|---------------------|----------------------------------|----------------------|-------------------------------|
|          | $\delta_c$ , Type   | $\delta_H$ , mult., (J in Hz)    | $\delta_c$ , Type    | $\delta_H$ , mult., (J in Hz) |
| 1        | 140.8, C            |                                  | 141.7, C             |                               |
| 2        | 124.2, C            |                                  | 125.3, C             |                               |
| 3        | 119.6, CH           | 7.23, s                          | 109.0, CH            | 7.34, s                       |
| 4        | 144.1, C            |                                  | 144.0, C             |                               |
| 5        | 103.3, C            |                                  | 103.6, C             |                               |
| 6        | 176.1, C            |                                  | 172.7, C             |                               |
| 7        | 107.0, C            |                                  | 111.8, C             |                               |
| 8        | 167.1, C            |                                  | 167.0, C             |                               |
| 9        | 115.0, C            |                                  | 115.3, C             |                               |
| 10       | 121.8, C            |                                  | 119.6, C             |                               |
| 11       | 193.5, C            |                                  | 197.3, C             |                               |
| 12       | 108.7, C            |                                  | 109.0, C             |                               |
| 13       | 21.9, $\text{CH}_3$ | 1.67, s                          | 22.2, $\text{CH}_3$  | 1.78, s                       |
| 14       | 6.9, $\text{CH}_3$  | 2.25, s                          | 7.54, $\text{CH}_3$  | 2.17, s                       |
| 15       | 171.7, C            |                                  | 172.7, C             |                               |
| 16       | 131.1, C            |                                  | 132.1, C             |                               |
| 17       | 134.5, CH           | 6.33, d, (11.0)                  | 134.2, CH            | 6.31, d, (10.7)               |
| 18       | 124.3, CH           | 6.43, dd, (14.8, 11.6)           | 125.3, CH            | 6.41, dd, (15.0, 11.3)        |
| 19       | 141.8, CH           | 6.00, dd, (15.6, 5.8)            | 141.7, CH            | 6.00, dd (15.3, 5.7)          |
| 20       | 39.3, CH            | 2.36, m                          | 39.7, CH             | 2.36, m                       |
| 21       | 73.1, CH            | 3.76, d, (8.9)                   | 73.6, CH             | 3.84, d, (7.6)                |
| 22       | 33.9, CH            | 1.78, m                          | 34.4, CH             | 1.77, m                       |
| 23       | 77.8, CH            | 3.12, dd, (10.3, 1.8)            | 78.1, CH             | 3.08, brd, (10.1)             |
| 24       | 38.8, CH            | 1.52, m                          | 39.1, CH             | 1.44, m                       |
| 25       | 79.1, CH            | 4.66, (overlap)                  | 79.7, CH             | 4.72 (overlapped)             |
| 26       | 39.2, CH            | 1.52, m                          | 39.7, CH             | 1.44, m                       |
| 27       | 77.9, CH            | 3.41, brd, (6.9)                 | 78.6, CH             | 3.43, brd, (6.1)              |
| 28       | 119.3, CH           | 4.98, dd, (12.7, 6.9)            | 119.6, CH            | 5.07, dd, (12.6, 7.0)         |
| 29       | 143.6, CH           | 6.14, d, (12.7)                  | 144.0, CH            | 6.18, d, (12.7)               |
| 30       | 20.8, $\text{CH}_3$ | 2.07, s                          | 20.8, $\text{CH}_3$  | 2.09, s                       |
| 31       | 17.3, $\text{CH}_3$ | 0.90, d, (7.0)                   | 17.9, $\text{CH}_3$  | 0.92, d, (6.6)                |
| 32       | 10.7, $\text{CH}_3$ | 1.00, d, (7.0)                   | 11.4, $\text{CH}_3$  | 0.99, d, (6.8)                |
| 33       | 9.5, $\text{CH}_3$  | 0.70, d, (7.0)                   | 9.4, $\text{CH}_3$   | 0.58, d, (6.6)                |
| 34       | 9.3, $\text{CH}_3$  | -0.43, d, (6.8)                  | 9.4, $\text{CH}_3$   | -0.31, d, (6.2)               |
| 35       | 172.5, C            |                                  | 172.7, C             |                               |
| 36       | 20.4, $\text{CH}_3$ | 2.02, s                          | 20.8, $\text{CH}_3$  | 2.01, s                       |
| 37       | 56.9, $\text{CH}_3$ | 3.01, s                          | 57.1, $\text{CH}_3$  | 3.03, s                       |
| 38       | 173.5, C            |                                  | 67.8, C              | 4.72, s                       |
| 39       | 62.3, $\text{CH}_2$ | 4.63, d (16.3)<br>4.56, d (16.8) | 172.7, $\text{CH}_2$ |                               |

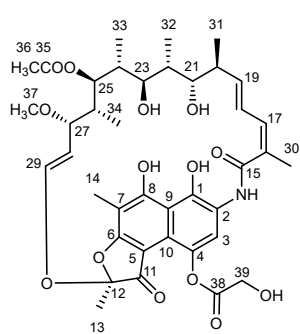

**Rifamycin L (R-L)**

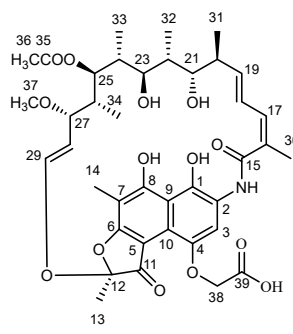

**Rifamycin B (R-B)**

**Supplementary Table 3** Amino acid sequence similarity and identity of Rif15a, Rif15b and Rif16 with other similar proteins. The percentage numbers of similarity and identity are obtained at <https://blast.ncbi.nlm.nih.gov/Blast.cgi> using the protein sequence of Rif15a, Rif15b and Rif16 as entries. The asterisks indicate the strains that have been discovered to be rifamycin producers. The pound signs represent the strain whose *rif15* and *rif16* counterparts are adjacent to each other on its genome.

| Species                               | Rif15a                               |                             | Rif15b                               |                             | Rif16                                |                             |
|---------------------------------------|--------------------------------------|-----------------------------|--------------------------------------|-----------------------------|--------------------------------------|-----------------------------|
|                                       | Protein ID/<br>locus_tag             | Similarity/<br>Identity (%) | Protein ID/<br>locus_tag             | Similarity/<br>Identity (%) | Protein ID/<br>locus_tag             | Similarity/<br>Identity (%) |
| <i>Amycolatopsis rifamycinica</i> *#  | WP_043781862.1/<br>DV20_RS18385      | 96%/<br>95%                 | WP_084093546.1/<br>DV20_RS18390      | 97%/<br>96%                 | WP_043781865.1/<br>DV20_RS18395      | 97%/<br>95%                 |
| <i>Salinispora arenicola</i> *        | WP_029021589.1/<br>B162_RS0115765    | 88%/<br>80%                 | WP_020217895.1/<br>B162_RS0115760    | 81%/<br>72%                 | WP_018796309.1/<br>B162_RS0115840    | 85%/<br>73%                 |
| <i>Micromonospora rifamycinica</i> *  | WP_067307198.1/<br>AWV63_RS12215     | 88%/<br>79%                 | WP_067307195.1/<br>AWV63_RS12210     | 82%/<br>75%                 | WP_084261269.1/<br>AWV63_RS12285     | 84%/<br>72%                 |
| <i>Actinomadura rifamycinini</i> *    | WP_051301103.1/<br>H505_RS0124100    | 80%/<br>74%                 | WP_026404027.1/<br>H505_RS0124105    | 81%/<br>73%                 | WP_026404031.1/<br>H505_RS0124125    | 84%/<br>72%                 |
| <i>Amycolatopsis tolypomycina</i>     | WP_091304035.1/<br>BLW76_RS01485     | 96%/<br>95%                 | WP_091304036.1/<br>BLW76_RS01490     | 97%/<br>94%                 | WP_091304041.1/<br>BLW76_RS01515     | 97%/<br>96%                 |
| <i>Amycolatopsis vancoresmycina</i> # | WP_003071778.1/<br>OO60_RS14045      | 86%/<br>80%                 | WP_003071776.1/<br>OO60_RS14040      | 91%/<br>87%                 | WP_003071775.1/<br>OO60_RS14035      | 88%/<br>78%                 |
| <i>Micromonospora nigra</i>           | WP_091080831.1/<br>GA0070616_RS11740 | 85%/<br>78%                 | WP_091080834.1/<br>GA0070616_RS11745 | 82%/<br>73%                 | WP_091080797.1/<br>GA0070616_RS11675 | 84%/<br>72%                 |
| <i>Saccharothrix espanaensis</i>      | WP_015104204.1/<br>BN6_RS33070       | 81%/<br>70%                 | WP_041314940.1<br>BN6_RS33065        | 72%/<br>61%                 | WP_015103353.1/<br>BN6_RS28805       | 72%/<br>58%                 |



**Supplementary Table 4** Oligonucleotide primers used in this study. The restriction sites are underlined, and the restriction enzymes are indicated in parentheses.

| Primer               | Sequence (5'-3')                                            |
|----------------------|-------------------------------------------------------------|
| <i>rif15-F</i>       | AATCGCC <u>CATATG</u> ATGCAGATGACCGAAGAGAAC ( <i>NdeI</i> ) |
| <i>rif15-R</i>       | CCCA <u>AAGCTT</u> GCCGACGAAGCGGGCGATCGA ( <i>HindIII</i> ) |
| <i>rif15a-pSJ2 F</i> | CGCGGATCC <u>CAGATG</u> ACCGAAGAGAACCT ( <i>BamHI</i> )     |
| <i>rif15a-pSJ2 R</i> | CCCA <u>AAGCTT</u> TTCATGCGGTGCTCCCTTCCT ( <i>HindIII</i> ) |
| <i>rif15b-F</i>      | GGAATTCC <u>CATATG</u> ACCGCCAGGTGACCAGG ( <i>NdeI</i> )    |
| <i>rif15b-R</i>      | AGGAATTCTCAGCCGACGAAGCGGGCGATC ( <i>EcoRI</i> )             |
| <i>rif16-F</i>       | GGGAATTCC <u>CATATG</u> GTGACGACCAAAGTGACC ( <i>NdeI</i> )  |
| <i>rif16-R</i>       | CCGCTCGAGTTAGGGAGCGTCCCAGGC ( <i>XhoI</i> )                 |

**Supplementary Table 5** Data collection and refinement statistics for Rif16 structures

|                                                      | Rif16 native         | R-L-bound Rif16       |
|------------------------------------------------------|----------------------|-----------------------|
| <b>Data collection</b>                               |                      |                       |
| Space group                                          | p21                  | p21                   |
| <b>Cell dimensions</b>                               |                      |                       |
| <i>a, b, c</i> (Å)                                   | 35.12, 70.34, 81.02  | 35.08, 70.71, 80.975, |
| <i>a, b, c</i> (°)                                   | 90.0, 94.433, 90.0   | 90.0, 94.002, 90.0    |
| Resolution (Å)                                       | 50.0-1.9 (1.94-1.90) | 50.0-2.6 (2.64-2.60)  |
| <i>R</i> <sub>sym</sub> or <i>R</i> <sub>merge</sub> | 0.092 (0.477)        | 0.110 (0.555)         |
| <i>I</i> / <i>sI</i>                                 | 28.5 (7)             | 15.5 (3.13)           |
| Completeness (%)                                     | 94.1 (95)            | 98.7 (99.3)           |
| Redundancy                                           | 6.3 (6.4)            | 5.8 (5.7)             |
| <b>Refinement</b>                                    |                      |                       |
| Resolution (Å)                                       | 1.9                  | 2.6                   |
| No. reflections                                      | 33798                | 12806                 |
| <i>R</i> <sub>work</sub> / <i>R</i> <sub>free</sub>  | 0.182/0.229          | 0.211/0.274           |
| <b>No. atoms</b>                                     |                      |                       |
| Protein                                              | 2804                 | 2870                  |
| Heme                                                 | 43                   | 43                    |
| Ligand                                               | no                   | 54                    |
| Water                                                | 157                  | 94                    |
| <b>B-factors</b>                                     |                      |                       |
| Protein                                              | 22.99                | 37.95                 |
| Heme                                                 | 11.42                | 23.15                 |
| Ligand                                               | no                   | 75.20                 |
| Water                                                | 28.23                | 33.90                 |
| <b>R.m.s. deviations</b>                             |                      |                       |
| Bond lengths (Å)                                     | 0.019                | 0.018                 |
| Bond angles (°)                                      | 1.897                | 1.920                 |

Highest-resolution shell is shown in parentheses.

## Supplementary References

- 1 Omura, T. & Sato, R. The carbon monoxide-binding pigment of liver microsomes II. Solubilization, purification, and properties. *J. Biol. Chem.* **239**, 2379-2385 (1964).
- 2 Di Tommaso, P. *et al.* T-Coffee: a web server for the multiple sequence alignment of protein and RNA sequences using structural information and homology extension. *Nucleic Acids Res.* **39**, W13-17 (2011).
- 3 Robert, X. & Gouet, P. Deciphering key features in protein structures with the new ENDscript server. *Nucleic Acids Res.* **42**, W320-324 (2014).
- 4 Eddine, A. N. *et al.* X-ray structure of 4,4'-dihydroxybenzophenone mimicking sterol substrate in the active site of sterol 14 $\alpha$ -demethylase (CYP51). *J. Biol. Chem.* **283**, 15152-15159 (2008).
- 5 Zhao, B. *et al.* Crystal structure of albaflavenone monooxygenase containing a moonlighting terpene synthase active site. *J. Biol. Chem.* **284**, 36711-36719 (2009).
- 6 Bell, S. G. *et al.* The crystal structures of 4-methoxybenzoate bound CYP199A2 and CYP199A4: structural changes on substrate binding and the identification of an anion binding site. *Dalton Trans.* **41**, 8703-8714 (2012).
- 7 Meharena, Y. T. *et al.* Crystal structure of P450cin in a complex with its substrate, 1,8-cineole, a close structural homologue to d-camphor, the substrate for P450cam. *Biochemistry* **43**, 9487-9494 (2004).
- 8 Raag, R. & Poulos, T. L. Crystal structures of cytochrome P-450<sub>CAM</sub> complexed with camphane, thiocamphor, and adamantane: factors controlling P-450 substrate hydroxylation. *Biochemistry* **30**, 2674-2684 (1991).
